# Supplementary material for: Muscle-specific economy of force generation and efficiency of work production during human running
Source: eLife. 2021 Sep 2;10:e67182. doi: 10.7554/eLife.67182 (PMC8412947; doi:10.7554/eLife.67182)
Supplement: Figure 1—source data 1. [file elife-67182-fig1-data1.xlsx]

## Sheet: Tabelle1
Fascicle length norm (L/L0)																																		MTU length norm (L/L0)
VL														SOL																				VL														SOL
1.11309	1.05048	0.953625	1.11053	1.01767	1.09061	1.01856	0.979068	1.32735	1.02513	0.899188	1.12188	1.12268	1.25696	0.965608	1.0401	0.962778	0.914935	1.0486	1.04875	1.07657	1.15112	0.852198	1.04607	0.831448	0.890742	1.10023	1.21039	1.13114	0.806002	0.830072	1.10277	0.86372		2.13772	2.9421	2.64546	3.10046	3.11954	2.78364	2.89093	2.5695	2.70141	3.00775	1.8235	2.984	2.969	2.9781	7.09828	7.29428
1.10925	1.04437	0.951459	1.10827	1.01391	1.0867	1.01553	0.978476	1.32007	1.02099	0.901114	1.11998	1.11973	1.25231	0.965791	1.04147	0.962484	0.914802	1.04576	1.04559	1.07489	1.14788	0.848991	1.0467	0.828443	0.891261	1.099	1.20796	1.12823	0.806058	0.827127	1.09994	0.862382		2.13857	2.94339	2.64643	3.10172	3.12039	2.78485	2.89195	2.57034	2.70258	3.00879	1.82432	2.98517	2.97005	2.97933	7.09845	7.2928
1.10542	1.03826	0.949294	1.10601	1.01014	1.08278	1.01251	0.977884	1.3128	1.01685	0.903039	1.11807	1.11678	1.24766	0.965974	1.04284	0.96219	0.91467	1.04292	1.04242	1.07322	1.14463	0.845784	1.04734	0.825438	0.89178	1.09777	1.20553	1.12533	0.806115	0.824183	1.09711	0.861078		2.13942	2.94468	2.64741	3.10298	3.12125	2.78606	2.89297	2.57118	2.70375	3.00982	1.82515	2.98634	2.9711	2.98055	7.09874	7.29128
1.10159	1.03214	0.947128	1.10375	1.00638	1.07887	1.00949	0.977292	1.30552	1.01271	0.904965	1.11616	1.11383	1.24301	0.966008	1.04393	0.961533	0.91437	1.04013	1.03998	1.07155	1.14139	0.84286	1.04779	0.822452	0.892299	1.09653	1.20223	1.12235	0.805904	0.821348	1.09416	0.860212		2.14068	2.94684	2.64883	3.1051	3.12266	2.78831	2.89473	2.57248	2.70548	3.01206	1.82671	2.98837	2.97307	2.98209	7.09917	7.28975
1.09775	1.02603	0.944962	1.10149	1.00261	1.07496	1.00646	0.9767	1.29824	1.00857	0.906891	1.11426	1.11088	1.23835	0.965846	1.04496	0.960783	0.914034	1.03735	1.03787	1.06987	1.13812	0.840269	1.04818	0.819506	0.892821	1.09526	1.19875	1.11933	0.80553	0.818528	1.09115	0.859397		2.14292	2.95013	2.65128	3.10834	3.12536	2.79162	2.89746	2.57486	2.70854	3.01503	1.82921	2.99189	2.97625	2.98551	7.09987	7.28821
1.09392	1.01991	0.942796	1.09923	0.998845	1.07105	1.00344	0.976107	1.29097	1.00444	0.908817	1.11235	1.10792	1.2337	0.965674	1.04575	0.959792	0.91361	1.03462	1.03603	1.06819	1.13476	0.837679	1.04847	0.816561	0.893332	1.09399	1.19468	1.11625	0.805064	0.815806	1.08808	0.858855		2.14516	2.95342	2.65374	3.11157	3.12806	2.79493	2.9002	2.57724	2.71159	3.01844	1.83171	2.9954	2.97942	2.98893	7.10078	7.28668
1.09008	1.0138	0.940631	1.09697	0.995084	1.06714	1.00042	0.975515	1.28369	1.00036	0.910742	1.11049	1.10497	1.22905	0.965174	1.04643	0.958648	0.913128	1.03194	1.03466	1.06651	1.13126	0.835623	1.04865	0.813755	0.893823	1.09268	1.19031	1.11306	0.804304	0.813117	1.08493	0.858359		2.14827	2.95843	2.65712	3.11648	3.13182	2.80022	2.90442	2.58051	2.71569	3.02326	1.83561	3.0006	2.98437	2.99297	7.10192	7.28521
1.08625	1.00768	0.938465	1.09471	0.991325	1.06322	0.997396	0.974923	1.27641	0.996271	0.912668	1.10865	1.10202	1.22441	0.964619	1.04692	0.957366	0.912624	1.02929	1.03331	1.06485	1.12767	0.833611	1.04881	0.810982	0.894315	1.09136	1.18559	1.10986	0.803543	0.810492	1.08177	0.857998		2.15198	2.96369	2.66115	3.12163	3.13631	2.80551	2.90885	2.58439	2.72051	3.02808	1.83972	3.0064	2.98959	2.99855	7.10345	7.28383
1.08241	1.00356	0.936299	1.09303	0.987566	1.06013	0.994862	0.974331	1.26914	0.995206	0.914905	1.10705	1.09989	1.21976	0.963904	1.04725	0.95592	0.912062	1.02674	1.03241	1.06321	1.12378	0.831806	1.04885	0.808284	0.894748	1.09002	1.18048	1.10646	0.802505	0.807908	1.07851	0.857661		2.15569	2.96954	2.66517	3.12736	3.14079	2.81171	2.91381	2.58826	2.72533	3.0344	1.8443	3.01243	2.99541	3.00412	7.10531	7.28256
1.08041	1.00393	0.93604	1.09265	0.986716	1.05786	0.993429	0.974465	1.26467	0.994645	0.917841	1.10749	1.09959	1.21526	0.962929	1.04746	0.954402	0.911527	1.02418	1.03152	1.06159	1.11981	0.830327	1.0489	0.805792	0.895176	1.08867	1.1752	1.10306	0.801419	0.805351	1.07526	0.857352		2.16055	2.97674	2.67042	3.13439	3.14679	2.81882	2.91991	2.59342	2.7316	3.04098	1.84993	3.0204	3.00258	3.01058	7.10751	7.28146
1.07863	1.0043	0.936011	1.09227	0.986219	1.0556	0.991996	0.974686	1.26054	0.994143	0.920777	1.10794	1.09929	1.21094	0.961922	1.04748	0.952768	0.910955	1.02177	1.03083	1.06009	1.11549	0.828847	1.04889	0.803308	0.895552	1.08731	1.16956	1.0995	0.800211	0.80283	1.07202	0.857035		2.16555	2.98393	2.6758	3.14142	3.15298	2.82593	2.92601	2.59874	2.73804	3.04835	1.85556	3.02837	3.00975	3.0182	7.11021	7.2806
1.07692	1.00496	0.936349	1.09257	0.985759	1.05363	0.99217	0.974952	1.25644	0.993705	0.923792	1.10839	1.0994	1.20663	0.960591	1.04742	0.951118	0.910435	1.01936	1.03024	1.05859	1.11104	0.82778	1.04887	0.801067	0.895882	1.08591	1.16382	1.09586	0.798869	0.800307	1.06876	0.856678		2.17078	2.99229	2.68141	3.1498	3.15947	2.83463	2.93311	2.60431	2.74477	3.0566	1.86223	3.0373	3.01828	3.02582	7.11336	7.28011
1.07548	1.00572	0.938259	1.09312	0.98546	1.05166	0.992899	0.975411	1.2525	0.99328	0.926834	1.10887	1.09966	1.20232	0.959164	1.04717	0.949383	0.909925	1.01708	1.02971	1.05727	1.10628	0.826782	1.04887	0.798941	0.896189	1.08453	1.15786	1.09216	0.797501	0.797803	1.06562	0.856279		2.17695	3.00107	2.68793	3.15866	3.16724	2.84333	2.94057	2.61099	2.75267	3.06501	1.86926	3.04728	3.02728	3.03448	7.11694	7.28
1.07403	1.00649	0.940168	1.09366	0.985162	1.04969	0.993628	0.97587	1.24856	0.992968	0.929876	1.10935	1.09991	1.19801	0.957567	1.04689	0.9477	0.909461	1.01485	1.0293	1.05601	1.10131	0.825922	1.04885	0.796902	0.896392	1.08311	1.15183	1.0883	0.795989	0.795277	1.06247	0.85581		2.18312	3.0101	2.69446	3.1678	3.17501	2.85268	2.94824	2.61767	2.76058	3.07485	1.87652	3.05726	3.03658	3.04394	7.12107	7.28035
1.07259	1.00725	0.942077	1.0942	0.984887	1.04773	0.994356	0.976329	1.24462	0.992656	0.932919	1.10989	1.10016	1.1937	0.95573	1.04642	0.94597	0.909075	1.01272	1.02889	1.05492	1.09613	0.825352	1.04889	0.795154	0.89659	1.08173	1.14576	1.08444	0.794466	0.792747	1.05954	0.855274		2.1898	3.02036	2.70147	3.17821	3.18347	2.86268	2.95694	2.62497	2.76909	3.08469	1.88478	3.06873	3.04726	3.05339	7.12575	7.28124
1.07114	1.00801	0.943987	1.09475	0.984638	1.04576	0.995085	0.976788	1.24068	0.994135	0.935961	1.11043	1.10041	1.18946	0.953835	1.04594	0.944358	0.908716	1.01071	1.0286	1.05399	1.09069	0.824782	1.04894	0.793449	0.896671	1.08036	1.13964	1.08044	0.792876	0.790186	1.05666	0.854668		2.19702	3.03061	2.70899	3.18862	3.19266	2.87268	2.96563	2.63291	2.77823	3.09556	1.89305	3.08048	3.05794	3.06391	7.13091	7.28283
1.0697	1.01161	0.945896	1.09572	0.984388	1.04477	0.995821	0.977246	1.23674	0.996329	0.938957	1.11113	1.10121	1.18523	0.951669	1.04531	0.94275	0.908482	1.00875	1.02832	1.05317	1.08509	0.824504	1.04904	0.791947	0.896716	1.07894	1.13362	1.07642	0.791256	0.787588	1.05398	0.853988		2.20423	3.04159	2.71651	3.19986	3.20185	2.88362	2.97491	2.64086	2.78738	3.10686	1.90195	3.09253	3.06949	3.07487	7.13663	7.28526
1.06931	1.01699	0.947883	1.09696	0.986027	1.04377	0.996562	0.97768	1.23493	0.998562	0.941925	1.11239	1.10235	1.18101	0.949418	1.04469	0.941287	0.908259	1.007	1.0281	1.05264	1.07926	0.824303	1.04919	0.790632	0.896685	1.07763	1.12761	1.07237	0.78963	0.784961	1.05152	0.853258		2.21206	3.05303	2.7245	3.2116	3.21196	2.89457	2.98454	2.64962	2.79729	3.11858	1.91123	3.10571	3.08158	3.08582	7.1429	7.28848
1.06921	1.02239	0.949892	1.09826	0.988188	1.04286	0.997401	0.978106	1.23371	1.00087	0.944896	1.11364	1.10351	1.1776	0.947032	1.04393	0.939888	0.908178	1.00527	1.02793	1.05215	1.07331	0.824181	1.04935	0.789376	0.896562	1.07629	1.12181	1.06827	0.78799	0.78226	1.04921	0.852468		2.22007	3.06451	2.73263	3.2234	3.22232	2.90576	2.99421	2.65861	2.80742	3.13114	1.92055	3.11888	3.09373	3.09768	7.14965	7.29254
1.06914	1.02835	0.951986	1.10092	0.990358	1.04203	1.00004	0.978526	1.23251	1.00318	0.947928	1.11491	1.10513	1.17432	0.944462	1.04319	0.938619	0.908096	1.00377	1.02777	1.05198	1.06719	0.824281	1.0496	0.788341	0.896393	1.075	1.11613	1.06419	0.786349	0.779531	1.04722	0.85165		2.22813	3.0768	2.74078	3.23621	3.23275	2.91721	3.00447	2.66765	2.81761	3.1437	1.93057	3.13264	3.10689	3.10969	7.15692	7.29756
1.06945	1.03432	0.955038	1.10358	0.992652	1.04121	1.00268	0.97887	1.23159	1.0056	0.950959	1.11618	1.10675	1.17105	0.941858	1.04233	0.937475	0.908144	1.0023	1.02771	1.05183	1.061	0.824381	1.04983	0.787375	0.896122	1.07377	1.11071	1.06013	0.784763	0.776698	1.04538	0.850808		2.23674	3.0891	2.74924	3.24902	3.24396	2.92866	3.01473	2.67738	2.82842	3.1572	1.94059	3.14683	3.12005	3.1217	7.16467	7.30356
1.06977	1.04028	0.958091	1.10624	0.994946	1.04038	1.0055	0.979213	1.23066	1.00803	0.953991	1.11745	1.10836	1.16779	0.939087	1.04147	0.936434	0.908175	1.00104	1.02765	1.05198	1.05468	0.824646	1.05015	0.786501	0.895811	1.07251	1.10549	1.05608	0.783173	0.773833	1.04389	0.849955		2.24536	3.10167	2.7577	3.26217	3.25516	2.94013	3.02515	2.68711	2.83923	3.17074	1.95079	3.16102	3.13353	3.13422	7.17286	7.31062
1.07008	1.04625	0.96114	1.10889	0.997265	1.03956	1.00852	0.979556	1.22974	1.01077	0.957023	1.11876	1.10998	1.16454	0.936266	1.04051	0.935544	0.908305	0.999875	1.02769	1.05215	1.04834	0.824971	1.05045	0.785769	0.895396	1.0714	1.10057	1.05215	0.781652	0.770837	1.04256	0.849112		2.2541	3.11455	2.76615	3.27567	3.26652	2.9516	3.03574	2.69699	2.85016	3.18463	1.96119	3.17568	3.14735	3.14673	7.18147	7.31862
1.07039	1.05221	0.964182	1.11155	0.999627	1.03913	1.01154	0.9799	1.22881	1.01375	0.960054	1.12008	1.1116	1.16129	0.933403	1.0395	0.934766	0.908417	0.998836	1.02776	1.05248	1.04192	0.825335	1.05078	0.78505	0.894921	1.07029	1.09592	1.04823	0.780161	0.7678	1.04152	0.84826		2.26305	3.12743	2.77459	3.28918	3.27814	2.96284	3.04633	2.7071	2.8613	3.19877	1.97159	3.19038	3.16116	3.15924	7.19048	7.32754
1.07071	1.05909	0.967225	1.11418	1.00199	1.03912	1.01457	0.980243	1.22789	1.01673	0.962209	1.12127	1.11294	1.15811	0.930438	1.03841	0.934077	0.908585	0.997948	1.02788	1.05289	1.03554	0.825806	1.05111	0.784414	0.894364	1.06921	1.09158	1.04446	0.778709	0.76461	1.04065	0.847441		2.27199	3.14048	2.78303	3.3029	3.28977	2.97385	3.05688	2.71722	2.87244	3.21294	1.98197	3.20506	3.17514	3.17168	7.19981	7.33739
1.07151	1.06605	0.970268	1.1168	1.00489	1.0391	1.01759	0.980563	1.2279	1.01966	0.964291	1.1222	1.11425	1.15493	0.927499	1.03718	0.933536	0.908726	0.997116	1.02806	1.05332	1.02912	0.826283	1.05141	0.783807	0.89376	1.06823	1.08753	1.04076	0.777346	0.761367	1.04001	0.846593		2.28097	3.15355	2.79122	3.31664	3.30135	2.98486	3.06744	2.72731	2.88356	3.22719	1.99235	3.21972	3.18913	3.18412	7.20947	7.34808
1.07255	1.07307	0.97331	1.11966	1.00805	1.03899	1.02068	0.980872	1.22837	1.02259	0.966307	1.12313	1.1155	1.15189	0.924513	1.03589	0.933008	0.90888	0.996471	1.02828	1.05383	1.02277	0.826822	1.0517	0.783196	0.89308	1.06724	1.08381	1.03715	0.775991	0.757954	1.03951	0.845783		2.28997	3.16656	2.79928	3.33032	3.31292	2.99501	3.07788	2.7374	2.89465	3.24145	2.00259	3.23437	3.20299	3.19639	7.21939	7.35962
1.07359	1.0802	0.976353	1.12293	1.01121	1.03889	1.02389	0.981181	1.22883	1.02551	0.968203	1.12402	1.11662	1.14921	0.921511	1.03437	0.932616	0.909001	0.995855	1.02856	1.05428	1.01642	0.827387	1.05194	0.782593	0.892356	1.06632	1.08036	1.03369	0.774731	0.754466	1.03915	0.844913		2.29897	3.17947	2.80735	3.34387	3.32449	3.00516	3.0881	2.74748	2.90575	3.25536	2.01256	3.24863	3.21662	3.2082	7.22953	7.37184
1.07512	1.08734	0.978711	1.12619	1.01423	1.03878	1.0271	0.981231	1.22951	1.02842	0.9701	1.12489	1.11775	1.14654	0.918577	1.03279	0.932198	0.90909	0.995374	1.02886	1.05475	1.01016	0.827964	1.05216	0.781955	0.891571	1.06543	1.07716	1.03027	0.773494	0.75082	1.03885	0.844063		2.30774	3.19237	2.81474	3.35743	3.33554	3.01474	3.09832	2.7571	2.91645	3.26919	2.02253	3.26269	3.23025	3.22002	7.23987	7.3847
1.07666	1.09447	0.981051	1.12945	1.01724	1.03868	1.03066	0.981275	1.23018	1.03091	0.971996	1.12576	1.11887	1.14387	0.915624	1.03093	0.931833	0.909144	0.994931	1.02921	1.05511	1.00396	0.828565	1.05231	0.781307	0.890712	1.06453	1.07425	1.02703	0.772308	0.747071	1.03859	0.843114		2.3165	3.20482	2.8221	3.37048	3.34658	3.02374	3.10801	2.7667	2.92714	3.28262	2.03189	3.2767	3.24316	3.23136	7.25033	7.39808
1.0782	1.10161	0.98324	1.13269	1.02026	1.03857	1.03431	0.981318	1.23086	1.03282	0.973893	1.12664	1.12	1.14121	0.912738	1.02898	0.931433	0.909134	0.994586	1.02958	1.05541	0.997844	0.829169	1.05242	0.780574	0.889828	1.06368	1.07147	1.02381	0.771174	0.74318	1.0383	0.842169		2.32511	3.21715	2.82922	3.38342	3.35735	3.03274	3.11756	2.77606	2.93763	3.2955	2.0411	3.28967	3.25589	3.24209	7.2609	7.41189
1.07974	1.10821	0.985024	1.13594	1.02327	1.03891	1.03797	0.981362	1.23154	1.03472	0.975548	1.12753	1.12104	1.13855	0.909906	1.02678	0.930999	0.909077	0.99428	1.02997	1.0556	0.991835	0.829779	1.05246	0.779786	0.888863	1.06282	1.06898	1.02072	0.770053	0.739164	1.03796	0.841081		2.3333	3.22927	2.83567	3.39612	3.36743	3.04043	3.12692	2.78476	2.94757	3.30832	2.05005	3.30264	3.26831	3.25281	7.27153	7.42607
1.08128	1.11306	0.986809	1.13917	1.02628	1.03925	1.04162	0.981405	1.23222	1.03645	0.976401	1.12804	1.12183	1.13586	0.907115	1.02446	0.930511	0.908934	0.994041	1.03039	1.05563	0.985903	0.830385	1.05243	0.778936	0.887885	1.06194	1.06652	1.01766	0.768993	0.735027	1.03749	0.839988		2.3415	3.24071	2.84212	3.40806	3.3775	3.04812	3.13563	2.79346	2.95751	3.31983	2.05819	3.31497	3.27971	3.26272	7.28218	7.44047
1.08292	1.11791	0.988583	1.1424	1.02892	1.03949	1.04528	0.981475	1.23292	1.03818	0.977253	1.12806	1.12262	1.13315	0.904427	1.02194	0.929933	0.908734	0.993845	1.03082	1.05555	0.980115	0.830988	1.05233	0.77798	0.886841	1.06104	1.06432	1.01466	0.767944	0.730752	1.03688	0.83871		2.34924	3.25214	2.84791	3.42	3.38683	3.05512	3.14433	2.80147	2.96686	3.33134	2.06633	3.32644	3.29111	3.27201	7.29281	7.45502
1.08464	1.12235	0.990349	1.14533	1.03127	1.03964	1.04894	0.981563	1.23364	1.03981	0.977784	1.12807	1.12307	1.13045	0.901796	1.0193	0.929269	0.908422	0.993692	1.03127	1.05528	0.974401	0.831574	1.05217	0.776984	0.885761	1.06012	1.06208	1.0117	0.766918	0.726376	1.03608	0.837419		2.35662	3.26278	2.85321	3.4311	3.39559	3.06142	3.15233	2.80896	2.97576	3.34175	2.07361	3.33791	3.30141	3.2813	7.30338	7.4696
1.08636	1.12657	0.992116	1.1481	1.03362	1.03978	1.05261	0.981652	1.23436	1.04139	0.978155	1.12798	1.12335	1.12763	0.899263	1.01657	0.9285	0.908054	0.993579	1.03174	1.05487	0.968849	0.832153	1.05192	0.775848	0.88464	1.05912	1.06002	1.00873	0.765918	0.721868	1.03506	0.835926		2.364	3.27303	2.85851	3.44179	3.40436	3.06773	3.15998	2.81645	2.98467	3.35162	2.08045	3.34797	3.31116	3.28941	7.31385	7.48412
1.08844	1.13079	0.993537	1.15085	1.03569	1.03993	1.05625	0.981488	1.2351	1.04264	0.978526	1.12786	1.12363	1.12476	0.896837	1.01374	0.927577	0.907544	0.993498	1.03223	1.05427	0.963401	0.832713	1.05161	0.774645	0.883469	1.05807	1.05789	1.00583	0.764924	0.717271	1.03378	0.834401		2.37046	3.28312	2.86277	3.45234	3.4118	3.07263	3.16751	2.82272	2.99248	3.36097	2.08715	3.35766	3.32072	3.29705	7.32421	7.49849
1.09057	1.13502	0.994905	1.15331	1.03772	1.04008	1.05958	0.981284	1.23585	1.04307	0.978897	1.12774	1.1239	1.1219	0.89451	1.01092	0.926559	0.906986	0.993456	1.03276	1.0535	0.958111	0.833242	1.0512	0.773374	0.882266	1.05695	1.05585	1.00286	0.763941	0.712572	1.03228	0.832704		2.37677	3.2919	2.86686	3.46161	3.41903	3.07754	3.174	2.82881	3.00012	3.36907	2.09257	3.36704	3.32864	3.30469	7.33439	7.51263
1.0927	1.13924	0.995985	1.15577	1.03974	1.04014	1.06292	0.981081	1.23659	1.04349	0.979268	1.1276	1.12418	1.11904	0.892282	1.00807	0.925387	0.906259	0.993429	1.0333	1.05259	0.952967	0.833759	1.05072	0.771965	0.881029	1.0557	1.0537	0.999955	0.762973	0.707805	1.03048	0.830955		2.38289	3.30068	2.87074	3.47089	3.426	3.08177	3.18048	2.83465	3.00753	3.37716	2.09799	3.37481	3.33655	3.31082	7.34439	7.52645
1.09484	1.14152	0.99558	1.15823	1.04168	1.04012	1.06615	0.980877	1.23734	1.04382	0.979326	1.12746	1.12441	1.11617	0.890165	1.00531	0.924087	0.905476	0.993451	1.03388	1.05147	0.948001	0.834241	1.05013	0.770527	0.879742	1.05439	1.05157	0.996953	0.761985	0.702963	1.02844	0.829073		2.38797	3.30863	2.87354	3.47934	3.43158	3.08532	3.18633	2.83923	3.01375	3.38364	2.1026	3.38258	3.34344	3.3167	7.35419	7.5399
1.09697	1.14214	0.995175	1.16069	1.04363	1.0401	1.06931	0.980673	1.23808	1.04413	0.979114	1.12689	1.12461	1.11331	0.88817	1.00263	0.922686	0.90454	0.993462	1.03449	1.05025	0.943199	0.834702	1.04945	0.76898	0.87843	1.05294	1.04934	0.993974	0.761024	0.698092	1.02617	0.827134		2.39305	3.31587	2.87634	3.48708	3.43717	3.08886	3.19164	2.84381	3.01997	3.38996	2.10652	3.38932	3.34944	3.32257	7.36372	7.55294
1.09903	1.14275	0.994675	1.16315	1.04496	1.03967	1.07246	0.980482	1.23852	1.04437	0.978902	1.12592	1.12481	1.11026	0.886284	1.00008	0.921119	0.903513	0.993534	1.0351	1.04881	0.938635	0.835134	1.04867	0.767387	0.877083	1.05135	1.04706	0.990978	0.760042	0.693178	1.02364	0.825107		2.39755	3.32312	2.87858	3.49482	3.44199	3.09112	3.19695	2.84769	3.02551	3.39539	2.11044	3.39513	3.35545	3.32665	7.37298	7.56544
1.10101	1.14212	0.994062	1.16519	1.04556	1.03925	1.07562	0.980305	1.23859	1.04454	0.978147	1.12496	1.1246	1.10721	0.884547	0.997698	0.919493	0.902363	0.993579	1.03577	1.04726	0.934258	0.835513	1.04774	0.765733	0.8757	1.04968	1.04468	0.987937	0.759055	0.688277	1.02091	0.823028		2.40135	3.32877	2.88015	3.50105	3.4459	3.09338	3.20108	2.85073	3.03023	3.40002	2.11293	3.40095	3.35962	3.33073	7.38198	7.57738
1.10299	1.14146	0.993449	1.16722	1.04616	1.03882	1.07877	0.980129	1.23867	1.04465	0.977378	1.12387	1.12439	1.1041	0.882899	0.995487	0.917703	0.901096	0.993664	1.03641	1.04556	0.930164	0.835875	1.04673	0.763995	0.874316	1.04778	1.04223	0.984954	0.758076	0.683374	1.01799	0.820903		2.40515	3.33437	2.88172	3.50725	3.44982	3.09502	3.20517	2.85378	3.03495	3.40443	2.11538	3.40506	3.36375	3.33455	7.39061	7.58876
1.10457	1.14079	0.992837	1.16887	1.04654	1.03839	1.08188	0.97951	1.23855	1.04444	0.976608	1.12276	1.12416	1.1006	0.881375	0.993491	0.915876	0.899728	0.993723	1.03709	1.04372	0.926293	0.836196	1.04553	0.76224	0.872872	1.04578	1.03966	0.981921	0.757045	0.678522	1.01492	0.818735		2.40791	3.33929	2.88238	3.51281	3.45251	3.09607	3.20879	2.8557	3.03853	3.40753	2.11725	3.40898	3.36715	3.33685	7.39893	7.59952
1.10602	1.14013	0.992224	1.16999	1.04685	1.03796	1.08493	0.978749	1.23837	1.04423	0.975839	1.12165	1.1239	1.09709	0.879974	0.991674	0.913942	0.898224	0.993792	1.03773	1.04177	0.922728	0.836482	1.04424	0.760414	0.871446	1.04365	1.03703	0.978955	0.756043	0.673722	1.01173	0.816553		2.41034	3.34322	2.88275	3.51748	3.45481	3.09711	3.21174	2.85726	3.04174	3.41063	2.11832	3.41242	3.36951	3.33914	7.40689	7.60967
1.10746	1.13946	0.991536	1.1711	1.04715	1.03699	1.08798	0.977983	1.2382	1.04407	0.97507	1.12049	1.12365	1.09359	0.878684	0.990091	0.911964	0.896639	0.993844	1.03836	1.03968	0.91944	0.836732	1.04277	0.758581	0.869977	1.04131	1.03428	0.976016	0.754979	0.668997	1.00845	0.814335		2.41271	3.34714	2.88306	3.52214	3.45703	3.09702	3.21469	2.85875	3.04487	3.41269	2.11938	3.41453	3.37187	3.34094	7.41444	7.61904
1.10887	1.13618	0.989517	1.17217	1.04739	1.03602	1.09033	0.977129	1.23802	1.04392	0.974139	1.11934	1.12337	1.09008	0.877544	0.988672	0.909955	0.894909	0.99387	1.03895	1.03749	0.916435	0.836928	1.04115	0.756689	0.868513	1.03885	1.03147	0.973126	0.753913	0.664387	1.00509	0.812122		2.41392	3.3497	2.88234	3.52552	3.45782	3.09694	3.21674	2.8589	3.04661	3.41442	2.11936	3.41664	3.37286	3.3415	7.42161	7.62769
1.11027	1.13243	0.987498	1.17323	1.04763	1.03466	1.09254	0.976274	1.23784	1.04375	0.973179	1.11779	1.12309	1.08658	0.876491	0.987466	0.907899	0.893113	0.993883	1.03947	1.03516	0.913775	0.837096	1.0394	0.754771	0.86705	1.03622	1.02855	0.970314	0.752817	0.65986	1.00168	0.809872		2.41513	3.35201	2.88162	3.52868	3.4586	3.09633	3.21861	2.85906	3.04834	3.41568	2.11914	3.41768	3.37361	3.34205	7.42834	7.63561
1.11155	1.12825	0.985165	1.1743	1.04743	1.03293	1.09477	0.975417	1.23743	1.04356	0.972061	1.11601	1.1227	1.08301	0.87554	0.986391	0.905865	0.89117	0.993838	1.03995	1.03272	0.911356	0.837226	1.03745	0.75284	0.865565	1.03344	1.02558	0.96757	0.751663	0.655512	0.998252	0.807636		2.41589	3.35386	2.88054	3.53142	3.45889	3.09519	3.2202	2.85876	3.04959	3.41618	2.1186	3.4181	3.37393	3.34189	7.43462	7.64275
1.11257	1.12297	0.982251	1.17541	1.04641	1.03119	1.09701	0.974556	1.23659	1.04337	0.97054	1.11423	1.12204	1.07938	0.874708	0.985477	0.903801	0.889178	0.993774	1.0403	1.03016	0.909338	0.837307	1.0354	0.750852	0.864122	1.03055	1.02248	0.964904	0.750521	0.651242	0.994806	0.805353		2.41584	3.35456	2.87878	3.53312	3.45828	3.09406	3.22107	2.85763	3.04993	3.41668	2.11724	3.41852	3.3732	3.34078	7.44046	7.64913
1.11359	1.1177	0.979337	1.17652	1.04539	1.02946	1.09926	0.973695	1.23575	1.04345	0.969018	1.11233	1.12138	1.07574	0.873981	0.984656	0.901789	0.887035	0.993623	1.04058	1.02745	0.907558	0.837351	1.03309	0.748872	0.862647	1.02744	1.01935	0.962365	0.749262	0.647211	0.991366	0.803087		2.41579	3.35526	2.87703	3.53482	3.45766	3.09196	3.22194	2.85649	3.05028	3.41606	2.11587	3.41736	3.37247	3.33966	7.44577	7.6545
1.11345	1.11242	0.976413	1.17687	1.04418	1.02772	1.10151	0.972398	1.23454	1.04353	0.967497	1.11042	1.1206	1.07201	0.873357	0.983913	0.899786	0.88485	0.993423	1.0407	1.02461	0.906158	0.837344	1.03068	0.746833	0.861223	1.02421	1.01608	0.959894	0.748003	0.643265	0.98793	0.80076		2.41506	3.35483	2.87469	3.53552	3.45623	3.08986	3.22216	2.85459	3.04979	3.41545	2.11378	3.41621	3.37078	3.33764	7.4506	7.65903
1.11267	1.10715	0.973482	1.17692	1.04288	1.02582	1.10376	0.970865	1.23313	1.04367	0.965976	1.10846	1.11978	1.0682	0.872823	0.983204	0.897839	0.882548	0.993147	1.04069	1.02164	0.904978	0.837298	1.02807	0.744784	0.859801	1.02085	1.01279	0.957516	0.746662	0.639561	0.984515	0.798447		2.41396	3.35396	2.87204	3.53583	3.45435	3.08733	3.22213	2.85227	3.04885	3.41418	2.11139	3.41451	3.36872	3.33493	7.45491	7.66265
1.11189	1.10163	0.970552	1.17697	1.04158	1.02374	1.10593	0.969332	1.23171	1.04386	0.964455	1.10638	1.11896	1.0644	0.872351	0.982498	0.895927	0.880202	0.992784	1.04053	1.01852	0.904096	0.837222	1.02531	0.742712	0.858405	1.01736	1.00934	0.955217	0.745261	0.635963	0.981105	0.796066		2.41286	3.35285	2.86939	3.53594	3.45247	3.08436	3.22197	2.84995	3.04791	3.4125	2.10886	3.41189	3.36647	3.33222	7.45865	7.66532
1.11077	1.09476	0.967377	1.17706	1.0403	1.02166	1.10769	0.96746	1.2303	1.04406	0.962938	1.1043	1.11811	1.06062	0.871978	0.981772	0.894072	0.877768	0.992345	1.04018	1.01527	0.90345	0.837083	1.02239	0.740578	0.857048	1.01371	1.00586	0.95297	0.743819	0.632601	0.977709	0.793691		2.41082	3.35052	2.86599	3.53492	3.4495	3.08139	3.22112	2.84659	3.04587	3.4106	2.10557	3.40927	3.3632	3.32845	7.46186	7.66702
1.10963	1.08789	0.964189	1.17715	1.03902	1.01884	1.10945	0.965569	1.22888	1.04427	0.961421	1.10165	1.11726	1.05683	0.871691	0.980985	0.892261	0.875287	0.991796	1.03966	1.01184	0.903024	0.836901	1.0193	0.738453	0.855704	1.00996	1.00222	0.9508	0.742256	0.629362	0.97431	0.79125		2.40873	3.34818	2.86253	3.53391	3.44648	3.07765	3.22027	2.84316	3.04377	3.40793	2.10228	3.40567	3.35994	3.32425	7.46445	7.66754
1.10842	1.08029	0.960788	1.17728	1.03757	1.01603	1.11104	0.963676	1.22739	1.04449	0.959532	1.0988	1.11623	1.05305	0.871441	0.980125	0.890501	0.872752	0.99116	1.03892	1.00828	0.902823	0.836673	1.01608	0.736261	0.85442	1.00605	0.998523	0.948647	0.740668	0.626346	0.970908	0.788808		2.40643	3.34502	2.85891	3.53215	3.44321	3.07391	3.21899	2.8395	3.04141	3.40527	2.09852	3.40171	3.35605	3.32005	7.46645	7.66706
1.10701	1.07218	0.956727	1.17743	1.03561	1.01322	1.11252	0.961779	1.22563	1.04501	0.957386	1.09594	1.11508	1.04965	0.871268	0.97916	0.888782	0.87017	0.990405	1.03794	1.00452	0.90278	0.836387	1.01267	0.734063	0.853162	1.00204	0.994685	0.946533	0.738939	0.623464	0.967488	0.786307		2.40349	3.34128	2.85476	3.52988	3.43917	3.06982	3.21741	2.83509	3.03827	3.40181	2.09444	3.39763	3.35174	3.31467	7.46787	7.66548
1.10559	1.06407	0.952666	1.17757	1.03364	1.01041	1.11399	0.959882	1.22387	1.04558	0.95524	1.09295	1.11392	1.04631	0.871118	0.978075	0.887104	0.867566	0.989533	1.03675	1.0006	0.902919	0.836073	1.00914	0.731816	0.851957	0.997952	0.990747	0.944406	0.737148	0.620788	0.964046	0.783802		2.40055	3.3375	2.85062	3.52757	3.43513	3.0654	3.21582	2.83068	3.03513	3.39823	2.09034	3.39245	3.3474	3.3091	7.46858	7.66281
1.10294	1.05596	0.948573	1.17733	1.03143	1.0076	1.11549	0.957809	1.2218	1.04618	0.953093	1.08996	1.11257	1.04296	0.871016	0.97686	0.885447	0.864918	0.988566	1.03526	0.996515	0.903157	0.835676	1.00544	0.729517	0.850792	0.993649	0.986696	0.942269	0.735263	0.618247	0.960565	0.781252		2.39722	3.33247	2.84617	3.52416	3.4306	3.06097	3.21362	2.82579	3.03149	3.39424	2.08555	3.38727	3.34218	3.30353	7.46869	7.65894
1.09923	1.04785	0.944453	1.17708	1.02901	1.00506	1.11699	0.955586	1.21948	1.04683	0.950947	1.08676	1.11122	1.04045	0.870973	0.975485	0.883821	0.862276	0.987416	1.03357	0.99219	0.903535	0.835214	1.00159	0.727224	0.849678	0.989304	0.982496	0.940088	0.733262	0.615893	0.957043	0.778694		2.39357	3.32744	2.84148	3.52075	3.42566	3.05596	3.21142	2.82049	3.02744	3.38983	2.08076	3.38157	3.33695	3.29675	7.46816	7.65378
1.09553	1.03977	0.940333	1.1769	1.02659	1.00253	1.11848	0.953364	1.21715	1.04747	0.948802	1.08333	1.10987	1.03793	0.870906	0.973961	0.882187	0.859608	0.986201	1.0316	0.987748	0.903951	0.834708	0.99761	0.724867	0.848596	0.984836	0.978226	0.937869	0.731202	0.613668	0.953455	0.776105		2.38993	3.3219	2.83679	3.51686	3.42071	3.05096	3.20898	2.81519	3.02338	3.38534	2.0757	3.37529	3.33138	3.28997	7.46686	7.64748
1.0914	1.03173	0.936253	1.17677	1.02422	0.999928	1.11996	0.950812	1.21482	1.04808	0.946658	1.0799	1.10852	1.03543	0.870876	0.972261	0.880567	0.856951	0.9848	1.02937	0.983066	0.904438	0.834109	0.993492	0.722505	0.847586	0.980228	0.973752	0.935562	0.728968	0.611604	0.949832	0.773509		2.38576	3.31577	2.83172	3.51243	3.41513	3.0457	3.20623	2.80927	3.01868	3.38022	2.07031	3.36901	3.32539	3.28305	7.46494	7.63995
1.0872	1.02369	0.93218	1.17665	1.02187	0.99727	1.12145	0.948196	1.2125	1.04868	0.944515	1.07568	1.10717	1.03296	0.870834	0.970405	0.878899	0.854297	0.98332	1.02689	0.978251	0.904913	0.833471	0.989242	0.720105	0.846599	0.975601	0.969259	0.933169	0.726676	0.609654	0.94613	0.770892		2.38148	3.30964	2.82658	3.50799	3.40943	3.04021	3.20349	2.80322	3.01385	3.37509	2.06493	3.36191	3.3194	3.27525	7.46235	7.63119
1.08299	1.01539	0.928157	1.17659	1.01952	0.994612	1.12251	0.94558	1.21014	1.04925	0.941947	1.07131	1.10585	1.0305	0.870781	0.968338	0.877225	0.851653	0.981664	1.02415	0.973221	0.905397	0.832729	0.984857	0.717669	0.845666	0.970761	0.964511	0.930688	0.724243	0.607835	0.942389	0.768264		2.37715	3.30263	2.82139	3.50273	3.40363	3.03471	3.20035	2.79709	3.00894	3.36955	2.05909	3.35465	3.31285	3.26745	7.45896	7.62116
1.07878	1.00707	0.924452	1.17654	1.01717	0.991954	1.12353	0.942964	1.20762	1.04981	0.93933	1.06692	1.10453	1.02848	0.870733	0.966144	0.875473	0.849034	0.979907	1.02118	0.968031	0.905823	0.83188	0.980362	0.715238	0.844774	0.96586	0.959786	0.928045	0.721701	0.606111	0.938595	0.765621		2.37242	3.29553	2.81596	3.49737	3.39729	3.02882	3.19716	2.79043	3.00348	3.36384	2.0532	3.34723	3.30623	3.25942	7.45491	7.60977
1.07458	0.998743	0.920747	1.17646	1.01483	0.989296	1.12457	0.940349	1.20509	1.05037	0.936713	1.06241	1.10328	1.02758	0.870623	0.96369	0.873664	0.84642	0.97799	1.01792	0.96266	0.906176	0.830985	0.975723	0.712772	0.84389	0.960894	0.954767	0.925331	0.719063	0.604483	0.934772	0.762959		2.36769	3.28817	2.81052	3.49175	3.39095	3.02293	3.19384	2.78377	2.99802	3.35797	2.04717	3.33915	3.29945	3.25083	7.45018	7.59716
1.06985	0.990419	0.917066	1.17635	1.01223	0.986981	1.12564	0.93778	1.20263	1.05094	0.934097	1.05791	1.10213	1.02667	0.870498	0.961118	0.871781	0.843838	0.975931	1.01448	0.957102	0.906459	0.829941	0.970977	0.710291	0.843065	0.955745	0.949777	0.922414	0.716273	0.602927	0.930902	0.760279		2.3628	3.28033	2.805	3.4856	3.3844	3.01688	3.19029	2.7769	2.99234	3.3518	2.04085	3.33106	3.29234	3.24223	7.44466	7.58332
1.06443	0.982095	0.913417	1.17623	1.0093	0.985009	1.12671	0.935272	1.20023	1.05152	0.93148	1.05314	1.10099	1.02663	0.870309	0.958274	0.869774	0.841261	0.973767	1.01078	0.951433	0.906579	0.828841	0.966118	0.707811	0.842215	0.95059	0.944522	0.919422	0.713425	0.601421	0.927044	0.757569		2.35771	3.27248	2.79937	3.47945	3.37755	3.01068	3.18673	2.76975	2.98638	3.34562	2.03454	3.3226	3.28524	3.23341	7.43845	7.56817
1.05901	0.974863	0.909768	1.17609	1.00637	0.983036	1.12774	0.932764	1.19784	1.05197	0.928701	1.04819	1.09984	1.02775	0.870057	0.955288	0.867702	0.8387	0.971391	1.00688	0.945542	0.906612	0.827616	0.961121	0.705311	0.841416	0.945265	0.939256	0.916206	0.710395	0.599963	0.923154	0.754831		2.35261	3.26422	2.79375	3.47282	3.37071	3.00448	3.18295	2.76261	2.98041	3.33911	2.02797	3.31385	3.27786	3.22426	7.43156	7.55182
1.05359	0.96796	0.906413	1.17594	1.00344	0.981733	1.12876	0.930579	1.19544	1.05242	0.925874	1.04323	1.0987	1.02887	0.869746	0.952032	0.865441	0.836143	0.968958	1.00276	0.939579	0.906413	0.82622	0.95605	0.702797	0.840601	0.939834	0.933786	0.912841	0.707296	0.598513	0.919319	0.752052		2.34735	3.25583	2.78807	3.46605	3.3636	2.99804	3.17911	2.75521	2.97418	3.33257	2.02132	3.3051	3.27041	3.21512	7.4239	7.53415
1.04816	0.961286	0.903166	1.17585	1.00053	0.98043	1.12973	0.928513	1.19305	1.05257	0.923029	1.03808	1.09763	1.03004	0.869336	0.948611	0.863116	0.83357	0.966282	0.998466	0.93343	0.906096	0.824786	0.950822	0.700301	0.839768	0.934389	0.928253	0.909364	0.704082	0.597076	0.915497	0.749228		2.34204	3.24737	2.78237	3.45917	3.35638	2.99161	3.17522	2.74772	2.96786	3.32589	2.01462	3.29589	3.26291	3.20581	7.41555	7.5153
1.04273	0.955496	0.899937	1.17597	0.997616	0.979156	1.13055	0.926448	1.19066	1.05249	0.920115	1.03291	1.09687	1.03125	0.868849	0.944905	0.860557	0.830989	0.963551	0.993977	0.927195	0.9055	0.823125	0.945535	0.697774	0.838938	0.928739	0.922572	0.905636	0.700752	0.595622	0.911754	0.746357		2.33672	3.23864	2.77668	3.45191	3.34916	2.98509	3.17116	2.74023	2.96153	3.31909	2.00773	3.28665	3.25524	3.19637	7.40652	7.4953
1.0373	0.949707	0.897315	1.1761	0.995027	0.977912	1.13138	0.924382	1.18818	1.05239	0.9172	1.02776	1.0961	1.03246	0.868227	0.941034	0.857899	0.828359	0.960593	0.989316	0.920856	0.904739	0.821388	0.940101	0.695254	0.838044	0.923072	0.916792	0.901856	0.69736	0.594134	0.908109	0.743421		2.33129	3.2299	2.77102	3.44466	3.34171	2.9785	3.1671	2.73254	2.95497	3.31226	2.00083	3.27732	3.24757	3.18694	7.39677	7.47414
1.03187	0.943971	0.894692	1.17614	0.992437	0.976667	1.1321	0.922317	1.18571	1.05215	0.914285	1.02266	1.09588	1.03541	0.867503	0.936856	0.855015	0.825682	0.957561	0.984518	0.914422	0.903701	0.819513	0.934603	0.692744	0.837134	0.917297	0.910905	0.897831	0.693836	0.592623	0.90452	0.74044		2.32586	3.22109	2.76536	3.43718	3.33426	2.97191	3.16295	2.72485	2.94842	3.30528	1.99383	3.26779	3.23984	3.17746	7.38636	7.45192
1.02663	0.938265	0.892452	1.17613	0.989847	0.975762	1.13278	0.920269	1.18353	1.05191	0.911369	1.01755	1.09595	1.03904	0.866641	0.932513	0.851957	0.822933	0.954316	0.979514	0.907966	0.90243	0.817393	0.928981	0.690192	0.83617	0.911392	0.904901	0.893733	0.690279	0.591023	0.901134	0.737374		2.32044	3.21224	2.75975	3.42959	3.32678	2.96524	3.15875	2.71715	2.94183	3.2983	1.98677	3.25826	3.23209	3.16797	7.37527	7.42857
1.02178	0.93274	0.891007	1.17612	0.987257	0.974856	1.13346	0.918259	1.18195	1.05159	0.908435	1.01257	1.09603	1.04268	0.865664	0.927874	0.848682	0.820072	0.950947	0.974419	0.90143	0.900882	0.815254	0.923267	0.687676	0.835131	0.905496	0.89881	0.889486	0.68662	0.589403	0.897828	0.734267		2.31501	3.20338	2.75424	3.42198	3.31923	2.95857	3.15454	2.70942	2.93519	3.29124	1.97971	3.24866	3.22434	3.15848	7.36352	7.40424
1.01694	0.929396	0.889561	1.17621	0.984667	0.97448	1.13413	0.91625	1.18038	1.05126	0.905285	1.00763	1.09613	1.04842	0.864507	0.923059	0.845199	0.817122	0.947444	0.969152	0.894909	0.899076	0.812805	0.917488	0.685133	0.834048	0.899429	0.892614	0.885101	0.682925	0.587661	0.89475	0.731071		2.30959	3.19458	2.74872	3.41423	3.31168	2.9519	3.15027	2.70169	2.92854	3.28417	1.97261	3.23904	3.21663	3.14915	7.35115	7.37894
1.01261	0.926052	0.888464	1.17629	0.98201	0.974634	1.13481	0.915622	1.17889	1.05066	0.902134	1.00277	1.09624	1.05451	0.863172	0.917991	0.841503	0.814006	0.943737	0.963818	0.888367	0.896985	0.810265	0.911579	0.682562	0.832849	0.893337	0.886342	0.880685	0.679177	0.5859	0.89184	0.727836		2.30424	3.18578	2.74334	3.40647	3.30417	2.94523	3.146	2.69404	2.92192	3.27708	1.9655	3.22942	3.20891	3.13984	7.33815	7.35279
1.00859	0.923786	0.887578	1.17643	0.979312	0.974789	1.13535	0.915837	1.17745	1.0497	0.899	0.999152	1.09658	1.06061	0.861712	0.912744	0.837574	0.810771	0.939976	0.958348	0.881852	0.894639	0.807598	0.905659	0.680044	0.831557	0.887217	0.879983	0.87612	0.675395	0.584001	0.88913	0.724517		2.29892	3.1771	2.73805	3.39873	3.29667	2.93856	3.14173	2.68644	2.91531	3.27	1.95844	3.21993	3.20129	3.13054	7.32453	7.32585
1.00458	0.922546	0.886692	1.17661	0.976614	0.975247	1.13578	0.916051	1.17601	1.04874	0.895883	0.995538	1.09716	1.06681	0.860008	0.907291	0.833396	0.807332	0.935937	0.952816	0.875404	0.891962	0.80462	0.899581	0.677458	0.830197	0.880998	0.873564	0.871548	0.671601	0.582082	0.886741	0.721162		2.29361	3.16855	2.73276	3.39099	3.28918	2.93197	3.13748	2.67884	2.90871	3.26291	1.95141	3.21044	3.19376	3.12163	7.31034	7.29809
1.00059	0.921306	0.886072	1.1768	0.974346	0.975705	1.1362	0.916333	1.17488	1.04749	0.892766	0.992145	1.09774	1.07302	0.858206	0.90166	0.829019	0.803717	0.931876	0.947216	0.868979	0.889069	0.801641	0.893505	0.674893	0.828679	0.874796	0.867078	0.866941	0.667794	0.580028	0.884483	0.71774		2.28848	3.16	2.72778	3.38325	3.28189	2.92539	3.13322	2.67153	2.90228	3.25591	1.94439	3.20111	3.18622	3.11272	7.29558	7.26967
0.996599	0.920407	0.885475	1.17677	0.972115	0.975945	1.13642	0.916622	1.17377	1.04624	0.889692	0.989054	1.09909	1.0795	0.856124	0.895912	0.824337	0.799921	0.927566	0.941557	0.862737	0.885858	0.798335	0.88733	0.672336	0.827114	0.868567	0.860552	0.862305	0.663997	0.577949	0.882641	0.714283		2.28336	3.15183	2.72282	3.3757	3.27462	2.9189	3.12906	2.66424	2.89586	3.24892	1.93759	3.19198	3.17898	3.10389	7.28025	7.24066
0.992925	0.919526	0.885314	1.17673	0.97005	0.975968	1.13664	0.916935	1.17291	1.04499	0.886621	0.985964	1.10047	1.08757	0.853844	0.890003	0.81947	0.795868	0.923211	0.935888	0.856509	0.882432	0.794922	0.881129	0.669723	0.825368	0.862321	0.85399	0.857727	0.660215	0.575759	0.880929	0.710788		2.27832	3.14368	2.71795	3.36817	3.26744	2.91251	3.12492	2.65706	2.88951	3.24205	1.9308	3.18285	3.17176	3.09558	7.26445	7.21118
0.990396	0.919604	0.886734	1.17684	0.968584	0.975991	1.13685	0.917339	1.17295	1.04372	0.883583	0.983755	1.10195	1.09564	0.851446	0.884038	0.814295	0.791676	0.918659	0.93021	0.850544	0.878735	0.791421	0.874896	0.667179	0.823526	0.856143	0.847413	0.853167	0.656476	0.573532	0.879662	0.707265		2.27351	3.13575	2.7134	3.36078	3.26058	2.90611	3.12085	2.65027	2.88343	3.23525	1.92418	3.17419	3.16472	3.08727	7.24812	7.18131
0.987867	0.921219	0.888154	1.17722	0.967118	0.976935	1.13708	0.917743	1.17299	1.04242	0.880599	0.981782	1.10357	1.10413	0.848698	0.877986	0.808885	0.78716	0.914019	0.924535	0.844648	0.874815	0.78761	0.868627	0.664583	0.821589	0.850001	0.840834	0.848655	0.652753	0.571233	0.878613	0.703739		2.2687	3.12817	2.70885	3.35363	3.25372	2.90001	3.11691	2.64349	2.87735	3.22855	1.91782	3.16566	3.15796	3.07918	7.23129	7.15108
0.986087	0.922834	0.890111	1.1776	0.965684	0.977879	1.1373	0.919366	1.17319	1.04104	0.877615	0.98018	1.10518	1.11368	0.845886	0.871913	0.803259	0.782558	0.909269	0.918927	0.838993	0.870718	0.783798	0.862369	0.661987	0.819456	0.843873	0.834272	0.844305	0.649142	0.56889	0.877902	0.700207		2.26408	3.12059	2.70456	3.34649	3.24716	2.89391	3.11297	2.63706	2.87151	3.22208	1.91145	3.15726	3.1512	3.07166	7.21407	7.12065
0.985018	0.926315	0.892578	1.17807	0.964279	0.979165	1.13748	0.922143	1.17356	1.03966	0.874784	0.980557	1.10706	1.12323	0.842765	0.865851	0.797293	0.777584	0.904388	0.913341	0.833539	0.866372	0.779753	0.856099	0.659464	0.817297	0.837963	0.827743	0.839957	0.645534	0.566519	0.877591	0.696712		2.25965	3.11361	2.70053	3.33982	3.24089	2.88802	3.1093	2.63097	2.86591	3.21561	1.9056	3.14956	3.14494	3.06414	7.19642	7.09013
0.983948	0.930204	0.895045	1.17855	0.962874	0.980792	1.13765	0.92492	1.17393	1.0382	0.871986	0.980934	1.109	1.13281	0.839438	0.859799	0.791221	0.77255	0.899464	0.907858	0.828238	0.861957	0.775602	0.849858	0.656891	0.814913	0.832085	0.821259	0.835884	0.642084	0.564107	0.877447	0.693257		2.25523	3.10676	2.69649	3.33325	3.23462	2.88234	3.10569	2.62487	2.8603	3.20956	1.89986	3.14185	3.1388	3.05704	7.17834	7.0596
0.983153	0.934251	0.897799	1.17898	0.961983	0.982419	1.13784	0.928356	1.1751	1.03673	0.869209	0.981768	1.11105	1.14244	0.836025	0.853857	0.784764	0.767189	0.894398	0.902461	0.823315	0.857317	0.77141	0.843663	0.65439	0.812485	0.826351	0.814869	0.831872	0.638676	0.561704	0.877867	0.689882		2.2512	3.10013	2.69293	3.32688	3.22898	2.87666	3.1022	2.6195	2.85522	3.20355	1.89434	3.1347	3.13285	3.0505	7.15996	7.02915
0.982422	0.938755	0.90062	1.17923	0.961211	0.98336	1.13805	0.931945	1.17647	1.03534	0.866496	0.983015	1.11337	1.15207	0.832216	0.847969	0.778254	0.761745	0.889325	0.897129	0.818441	0.852662	0.766998	0.837485	0.651918	0.809915	0.820917	0.808547	0.828056	0.635389	0.559284	0.878344	0.686623		2.24726	3.09414	2.68947	3.32106	3.2235	2.87154	3.09905	2.6143	2.85025	3.19787	1.88943	3.12804	3.12749	3.04396	7.14125	6.99892
0.981847	0.943259	0.903566	1.17949	0.960551	0.9843	1.13827	0.935551	1.17796	1.03402	0.863783	0.984262	1.1157	1.16152	0.828378	0.842267	0.771384	0.756078	0.884143	0.89199	0.814083	0.847869	0.762586	0.831454	0.649438	0.807219	0.815483	0.802372	0.82449	0.632248	0.556897	0.879431	0.683486		2.24339	3.08814	2.68609	3.31525	3.21812	2.86642	3.0959	2.60921	2.84537	3.19248	1.88452	3.12139	3.12212	3.03809	7.12221	6.96905
0.982559	0.948926	0.907553	1.18005	0.960808	0.98558	1.13866	0.939292	1.18052	1.03282	0.861423	0.987098	1.11816	1.17083	0.824271	0.836694	0.764449	0.750295	0.878954	0.886861	0.809756	0.843074	0.758062	0.825442	0.647114	0.804487	0.810516	0.796313	0.820968	0.629142	0.554535	0.880598	0.680578		2.24005	3.08286	2.68333	3.31008	3.2136	2.86167	3.09314	2.60507	2.84118	3.18721	1.88032	3.11585	3.1174	3.03272	7.10297	6.93958
0.983272	0.955109	0.91154	1.18074	0.961065	0.987202	1.13914	0.943033	1.18308	1.03235	0.85922	0.990121	1.12067	1.18013	0.819976	0.83133	0.75728	0.744402	0.873721	0.88198	0.805916	0.838251	0.753472	0.819631	0.644804	0.801565	0.805716	0.790417	0.817932	0.626329	0.55222	0.882225	0.677819		2.2367	3.0779	2.68057	3.3052	3.20907	2.85727	3.09057	2.60093	2.83699	3.18261	1.87645	3.11044	3.11298	3.02735	7.08353	6.9106
0.984698	0.961506	0.916052	1.18158	0.961476	0.988823	1.13963	0.94728	1.18581	1.03187	0.857099	0.993651	1.12323	1.18923	0.815644	0.82621	0.749996	0.738392	0.868478	0.877122	0.802222	0.833442	0.748872	0.813904	0.642551	0.798641	0.801043	0.784723	0.814902	0.623518	0.549987	0.884057	0.67544		2.23364	3.07308	2.67813	3.30045	3.205	2.85287	3.08809	2.59729	2.83317	3.178	1.87272	3.10541	3.10869	3.02296	7.06386	6.88217
0.98717	0.969356	0.921333	1.18332	0.962113	0.991517	1.14025	0.952268	1.18878	1.03181	0.855532	0.998603	1.12614	1.19825	0.810966	0.82127	0.742619	0.732355	0.863237	0.872426	0.798855	0.828676	0.744186	0.808363	0.640513	0.795581	0.797066	0.779169	0.8123	0.620993	0.547797	0.886145	0.673216		2.23098	3.06928	2.67615	3.29667	3.2016	2.84935	3.08623	2.5944	2.82989	3.17412	1.87004	3.10144	3.10537	3.01896	7.0441	6.85459
0.989643	0.977206	0.926614	1.18507	0.96275	0.994212	1.14087	0.957257	1.19176	1.03187	0.853965	1.00355	1.12906	1.20727	0.806281	0.816719	0.735118	0.726252	0.858007	0.867819	0.795801	0.823982	0.7395	0.803033	0.638475	0.792482	0.793089	0.773936	0.809872	0.618568	0.545758	0.888546	0.671562		2.22832	3.06547	2.67418	3.2929	3.19819	2.84583	3.08438	2.5915	2.82662	3.17047	1.86736	3.09746	3.10204	3.01497	7.02426	6.82782
0.992705	0.985456	0.932413	1.18671	0.963892	0.996835	1.14168	0.963008	1.19583	1.03211	0.852592	1.00894	1.13221	1.21623	0.801431	0.812274	0.727605	0.720161	0.852795	0.863269	0.792906	0.819335	0.734806	0.79782	0.636666	0.789339	0.789691	0.768791	0.807671	0.616305	0.543746	0.891045	0.670043		2.22625	3.06239	2.67281	3.28981	3.19566	2.84284	3.08299	2.58958	2.82407	3.16724	1.86544	3.09448	3.09941	3.01229	7.00436	6.80189
0.996017	0.994015	0.938432	1.18828	0.965247	0.999385	1.14264	0.969082	1.20037	1.03264	0.851369	1.01457	1.13553	1.22519	0.796447	0.80838	0.720034	0.714114	0.847647	0.85883	0.790478	0.814858	0.730106	0.792993	0.635019	0.786129	0.786718	0.76412	0.805883	0.614313	0.541955	0.893894	0.669325		2.22443	3.05987	2.6717	3.28726	3.1935	2.84038	3.08196	2.58806	2.82183	3.16469	1.8641	3.09209	3.09731	3.00984	6.98447	6.77684
0.999328	1.00257	0.94445	1.18985	0.966601	1.00193	1.1436	0.975155	1.20491	1.03317	0.850146	1.0202	1.13885	1.23414	0.791463	0.804486	0.712463	0.708067	0.8425	0.854391	0.78805	0.810381	0.725407	0.788165	0.633373	0.78292	0.783745	0.759449	0.804096	0.612321	0.540163	0.896743	0.668691		2.2226	3.05736	2.6706	3.28471	3.19133	2.83791	3.08094	2.58654	2.81958	3.16215	1.86276	3.08969	3.09522	3.00739	6.96461	6.75273
[truncated: 83 more columns]
