# Supplementary material for: Muscle-specific economy of force generation and efficiency of work production during human running
Source: eLife. 2021 Sep 2;10:e67182. doi: 10.7554/eLife.67182 (PMC8412947; doi:10.7554/eLife.67182)
Supplement: Figure 2—source data 1. [file elife-67182-fig2-data1.xlsx]

## Sheet: Tabelle1
Force-length potential				Force-velocity potential				Force-length-velocity potential
Potential	SOL	VL		Potential	SOL	VL		Potential	SOL	VL
FL	0.97	0.97		FV	0.78	0.91		FLV	0.66	0.87
FL	0.98	0.96		FV	0.75	0.91		FLV	0.64	0.88
FL	0.97	0.98		FV	0.73	0.97		FLV	0.61	0.95
FL	0.95	0.91		FV	0.77	1.08		FLV	0.64	0.98
FL	0.97	1		FV	0.76	0.95		FLV	0.65	0.95
FL	0.99	0.99		FV	0.79	0.92		FLV	0.69	0.91
FL	0.96	0.94		FV	0.7	1.12		FLV	0.57	1.06
FL	0.96	0.99		FV	0.68	0.98		FLV	0.55	0.97
FL	0.86	0.6		FV	0.84	0.89		FLV	0.68	0.53
FL	0.93	0.99		FV	0.74	1.02		FLV	0.62	1.01
FL	0.78	0.99		FV	0.73	0.95		FLV	0.48	0.94
FL	0.94	0.95		FV	0.87	0.91		FLV	0.75	0.87
FL	0.93	0.92		FV	0.64	1.02		FLV	0.49	0.94
FL	0.87	0.87		FV	0.57	0.87		FLV	0.38	0.76
FL	0.98			FV	0.63			FLV	0.48
FL	0.8			FV	0.76			FLV	0.53
FL	0.85			FV	0.68			FLV	0.46
FL	0.98			FV	0.76			FLV	0.64
FL	0.82			FV	0.79			FLV	0.58
