# Supplementary material for: Muscle-specific economy of force generation and efficiency of work production during human running
Source: eLife. 2021 Sep 2;10:e67182. doi: 10.7554/eLife.67182 (PMC8412947; doi:10.7554/eLife.67182)
Supplement: Figure 3—source data 1. [file elife-67182-fig3-data1.xlsx]

## Sheet: Tabelle1
Soleus						Vastus lateralis
V/Vmax	Efficiency					V/Vmax	Efficiency					X
0.0958480795359961	0.419061536162123					0.0356858828362397	0.294437832005599					-498064779442673	-0.100000000000000
0.109440690551455	0.430608929203276					0.0128238397692357	0.150590227323361					-405303240887963	-0.0900000000000000
0.121428171232335	0.437518184606683					0.00195106176567581	0.0271253754134560					-324264314937084	-0.0800000000000000
0.0970908336891935	0.420301674926792					-0.0253841690595565	-0.526826834925299					-254131610247802	-0.0700000000000000
0.100605048079759	0.423599570343317					0.0152487012602489	0.172389058264302					-194088735477885	-0.0600000000000000
0.0989793041034724	0.422111742506374					0.0251765775150930	0.243696072080545					-143319299285100	-0.0500000000000000
0.140166291909223	0.443569262942731					-0.0428535940305449	-112266405373265					-101006910327213	-0.0400000000000000
0.163861725880500	0.445927757734196					0.000285801256261366	0.00407612431865060					-0.663351772619931	-0.0300000000000000
0.0711077186236728	0.385281100953984					0.0374878466566437	0.301253985037090					-0.384877087472061	-0.0200000000000000
0.124168557308398	0.438729349802003					-0.00237684960967709	-0.0353012947314618					-0.166481134406193	-0.0100000000000000
0.109389657379662	0.430573410656409					0.0139924233053754	0.161332588691990					0	0
0.0556666089625220	0.353575635929498					0.0282313321454102	0.260666161068258					0.122730229168847	0.0100000000000000
0.174935063662285	0.446101882592636					-0.00518224764172447	-0.0802972913699394					0.209873466522678	0.0200000000000000
0.209399578761824	0.444829292638165					0.00734890633550267	0.0939953075088263					0.269593625483820	0.0300000000000000
0.165801177556522	0.445980022802785											0.310054619474603	0.0400000000000000
0.0987045208636425	0.421853879039143											0.339403255899251	0.0500000000000000
0.131755702953342	0.441463440685434											0.363449522308346	0.0600000000000000
0.0989325162110301	0.422067967098077											0.383313754812884	0.0700000000000000
0.0799747565534872	0.399518808105659											0.399555714301601	0.0800000000000000
												0.412683400994028	0.0900000000000000
												0.423053363713096	0.100000000000000
												0.430994596822549	0.110000000000000
												0.436836094686135	0.120000000000000
												0.440906851667601	0.130000000000000
												0.443535862130692	0.140000000000000
												0.445052120439155	0.150000000000000
												0.445784620956738	0.160000000000000
												0.446060345185923	0.170000000000000
												0.446085502924462	0.180000000000000
												0.445879107811101	0.190000000000000
												0.445444070587241	0.200000000000000
												0.444783301994282	0.210000000000000
												0.443899712773625	0.220000000000000
												0.442796213666671	0.230000000000000
												0.441475715414820	0.240000000000000
												0.439941128759472	0.250000000000000
												0.438195364442029	0.260000000000000
												0.436241333203890	0.270000000000000
												0.434081945786457	0.280000000000000
												0.431720112931129	0.290000000000000
												0.429158745379308	0.300000000000000
												0.426400753872395	0.310000000000000
												0.423449056066836	0.320000000000000
												0.420308441003388	0.330000000000000
												0.416988092234268	0.340000000000000
												0.413497823445190	0.350000000000000
												0.409847448321864	0.360000000000000
												0.406046780550002	0.370000000000000
												0.402105633815316	0.380000000000000
												0.398033821803517	0.390000000000000
												0.393841158200317	0.400000000000000
												0.389537456691428	0.410000000000000
												0.385132530962561	0.420000000000000
												0.380636194699428	0.430000000000000
												0.376058261587741	0.440000000000000
												0.371408253036618	0.450000000000000
												0.366690443506774	0.460000000000000
												0.361904568989374	0.470000000000000
												0.357050215830051	0.480000000000000
												0.352126970374433	0.490000000000000
												0.347134418968153	0.500000000000000
												0.342072147956840	0.510000000000000
												0.336939743686126	0.520000000000000
												0.331736792501642	0.530000000000000
												0.326462880749018	0.540000000000000
												0.321117594773885	0.550000000000000
												0.315700520921874	0.560000000000000
												0.310211245538616	0.570000000000000
												0.304649354969742	0.580000000000000
												0.299014435560882	0.590000000000000
												0.293306073657668	0.600000000000000
												0.287523855605729	0.610000000000000
												0.281667367750697	0.620000000000000
												0.275736196438203	0.630000000000000
												0.269729928013878	0.640000000000000
												0.263648148823352	0.650000000000000
												0.257490445212256	0.660000000000000
												0.251256403526221	0.670000000000000
												0.244945610110878	0.680000000000000
												0.238557651311858	0.690000000000000
												0.232092113474791	0.700000000000000
												0.225548582945309	0.710000000000000
												0.218926646069041	0.720000000000000
												0.212225889191619	0.730000000000000
												0.205445898658674	0.740000000000000
												0.198586260815837	0.750000000000000
												0.191646562008738	0.760000000000000
												0.184626388583008	0.770000000000000
												0.177525326884278	0.780000000000000
												0.170342963258179	0.790000000000000
												0.163078884050342	0.800000000000000
												0.155732675606397	0.810000000000000
												0.148303924271976	0.820000000000000
												0.140792216392708	0.830000000000000
												0.133197138314225	0.840000000000000
												0.125518276382159	0.850000000000000
												0.117755216942138	0.860000000000000
												0.109907546339795	0.870000000000000
												0.101974850920761	0.880000000000000
												0.0939567170306648	0.890000000000000
												0.0858527310151389	0.900000000000000
												0.0776624792198136	0.910000000000000
												0.0693855479903198	0.920000000000000
												0.0610215236722882	0.930000000000000
												0.0525699926113497	0.940000000000000
												0.0440305411531352	0.950000000000000
												0.0354027556432754	0.960000000000000
												0.0266862224274012	0.970000000000000
												0.0178805278511434	0.980000000000000
												0.00898525826013269	0.990000000000000
												0	1
												-0.00907566058362386	101000000000000
												-0.0182421371451080	102000000000000
												-0.0274998433388217	103000000000000
												-0.0368491928191342	104000000000000
												-0.0462905992404145	105000000000000
												-0.0558244762570319	106000000000000
												-0.0654512375233553	107000000000000
												-0.0751712966937546	108000000000000
												-0.0849850674225982	109000000000000
												-0.0948929633642556	110000000000000
												-0.104895398173096	111000000000000
												-0.114992785503489	112000000000000
												-0.125185539009803	113000000000000
												-0.135474072346407	114000000000000
												-0.145858799167672	115000000000000
												-0.156340133127965	116000000000000
												-0.166918487881656	117000000000000
												-0.177594277083114	118000000000000
												-0.188367914386709	119000000000000
												-0.199239813446810	120000000000000

## Sheet: Tabelle2
Figure 3
Soleus		Vastus lateralis			Norm curve (ref: Hill 1964)
Fascicle velocity (V/Vmax)	Efficiency	Fascicle velocity (V/Vmax)	Efficiency		Y	X
0.0958481	0.419062	0.0356859	0.294438		-0.166481	-0.01
0.109441	0.430609	0.0128238	0.15059		0	0
0.121428	0.437518	0.00195106	0.0271254		0.12273	0.01
0.0970908	0.420302	-0.0253842	-0.526827		0.209873	0.02
0.100605	0.4236	0.0152487	0.172389		0.269594	0.03
0.0989793	0.422112	0.0251766	0.243696		0.310055	0.04
0.140166	0.443569	0.000285801	0.00407612		0.339403	0.05
0.163862	0.445928	0.0374878	0.301254		0.36345	0.06
0.0711077	0.385281	-0.00237685	-0.0353013		0.383314	0.07
0.124169	0.438729	0.0139924	0.161333		0.399556	0.08
0.10939	0.430573	0.0282313	0.260666		0.412683	0.09
0.0556666	0.353576	-0.00518225	-0.0802973		0.423053	0.1
0.174935	0.446102	0.00734891	0.0939953		0.430995	0.11
0.2094	0.444829				0.436836	0.12
0.165801	0.44598				0.440907	0.13
0.0987045	0.421854				0.443536	0.14
0.131756	0.441463				0.445052	0.15
0.0989325	0.422068				0.445785	0.16
0.0799748	0.399519				0.44606	0.17
					0.446086	0.18
					0.445879	0.19
					0.445444	0.2
					0.444783	0.21
					0.4439	0.22
					0.442796	0.23
					0.441476	0.24
					0.439941	0.25
					0.438195	0.26
					0.436241	0.27
					0.434082	0.28
					0.43172	0.29
					0.429159	0.3
					0.426401	0.31
					0.423449	0.32
					0.420308	0.33
					0.416988	0.34
					0.413498	0.35
					0.409847	0.36
					0.406047	0.37
					0.402106	0.38
					0.398034	0.39
					0.393841	0.4
					0.389537	0.41
					0.385133	0.42
					0.380636	0.43
					0.376058	0.44
					0.371408	0.45
					0.36669	0.46
					0.361905	0.47
					0.35705	0.48
					0.352127	0.49
					0.347134	0.5
					0.342072	0.51
					0.33694	0.52
					0.331737	0.53
					0.326463	0.54
					0.321118	0.55
					0.315701	0.56
					0.310211	0.57
					0.304649	0.58
					0.299014	0.59
					0.293306	0.6
					0.287524	0.61
					0.281667	0.62
					0.275736	0.63
					0.26973	0.64
					0.263648	0.65
					0.25749	0.66
					0.251256	0.67
					0.244946	0.68
					0.238558	0.69
					0.232092	0.7
					0.225549	0.71
					0.218927	0.72
					0.212226	0.73
					0.205446	0.74
					0.198586	0.75
					0.191647	0.76
					0.184626	0.77
					0.177525	0.78
					0.170343	0.79
					0.163079	0.8
					0.155733	0.81
					0.148304	0.82
					0.140792	0.83
					0.133197	0.84
					0.125518	0.85
					0.117755	0.86
					0.109908	0.87
					0.101975	0.88
					0.0939567	0.89
					0.0858527	0.9
					0.0776625	0.91
					0.0693855	0.92
					0.0610215	0.93
					0.05257	0.94
					0.0440305	0.95
					0.0354028	0.96
					0.0266862	0.97
					0.0178805	0.98
					0.00898526	0.99
					0	1
