# Supplementary material for: Muscle-specific economy of force generation and efficiency of work production during human running
Source: eLife. 2021 Sep 2;10:e67182. doi: 10.7554/eLife.67182 (PMC8412947; doi:10.7554/eLife.67182)
Supplement: Figure 4—source data 1. [file elife-67182-fig4-data1.xlsx]

## Sheet: Tabelle1
Figure 4
Delta length norm (L/L0)																																							Delta length norm (L/L0)
SOL	subplot 3.3.1																																						VL	subplot 3.3.4
MTU																			Belly																				MTU
0	0	0	0	0	0	0	0	0	0	0	0	0	0	0	0	0	0	0	0	0	0	0	0	0	0	0	0	0	0	0	0	0	0	0	0	0	0		0	0	0	0	0	0	0	0	0	0	0
0.000172912	-0.00148097	-0.00206334	-0.00172203	-0.000359443	0.000152283	-0.00166374	-0.00462826	0.000320628	-0.00150125	-0.000990675	-0.000151086	-0.000932609	-0.00180983	0.001247	0.00165036	-0.00260228	0.000341652	0.00109151	0.000106303	0.00153969	-0.000251472	-0.000277554	-0.00276753	-0.00329889	-0.00197183	-0.00308482	-0.00348706	0.000578338	-0.00319916	0.000525474	-0.00138059	-0.00261961	-0.00314213	-6.96422e-05	-0.00312523	-0.00287861	-0.00130623		0.000850807	0.00129057	0.000977561	0.00126145	0.000856342	0.00120692	0.00101701	0.000840259	0.0011734	0.00103673	0.000826721
0.00046502	-0.00299642	-0.00418576	-0.00348068	-0.00046957	0.000357018	-0.00370303	-0.00937238	0.00089032	-0.00289312	-0.00174047	-0.000384828	-0.00186002	-0.00410853	0.00230808	0.00354412	-0.00543095	0.000952838	0.00170915	0.000212915	0.00307969	-0.000502574	-0.000555291	-0.00553278	-0.00659634	-0.00394413	-0.00616925	-0.00697111	0.00115773	-0.00639589	0.00105123	-0.00276052	-0.00523802	-0.00628116	-0.000138347	-0.00624864	-0.00575523	-0.00257911		0.00170161	0.00258114	0.00195512	0.00252291	0.00171268	0.00241384	0.00203401	0.00168052	0.0023468	0.00207346	0.00165344
0.000886046	-0.00453268	-0.00635225	-0.00523348	-0.000314479	0.000623245	-0.00610045	-0.0142056	0.00171182	-0.00413648	-0.00222725	-0.000689581	-0.00278	-0.00688422	0.00318161	0.00569826	-0.00847198	0.00185267	0.00182741	0.000166491	0.00430284	-0.0011161	-0.00102323	-0.00820661	-0.00922837	-0.00594002	-0.00930709	-0.0101845	0.00154625	-0.00957803	0.00155981	-0.00417078	-0.00875824	-0.00950175	-0.000499819	-0.00921335	-0.00871369	-0.00344136		0.00296428	0.00474312	0.00337173	0.00464416	0.00311778	0.00467158	0.00379878	0.00297858	0.00407852	0.00430825	0.00321023
0.0015882	-0.00607478	-0.0085427	-0.00693291	0.000121896	0.000972499	-0.00884192	-0.0190967	0.00307281	-0.00519052	-0.00216176	-0.00105319	-0.00363057	-0.01012	0.00382762	0.00821853	-0.0117057	0.00306076	0.0014309	-8.23395e-05	0.00546219	-0.00182012	-0.00153323	-0.010852	-0.0115448	-0.0079487	-0.0124759	-0.0130809	0.00187108	-0.0127246	0.00206015	-0.00562573	-0.0124553	-0.0127562	-0.00104079	-0.0121551	-0.0117041	-0.00425256		0.00520044	0.00803282	0.00582608	0.00787809	0.00581994	0.00798013	0.00653126	0.00535872	0.00712991	0.00728031	0.00571182
0.00250085	-0.00760169	-0.0107165	-0.00850155	0.000970097	0.0014693	-0.0119751	-0.0239734	0.00478807	-0.00588816	-0.00174544	-0.00142849	-0.00440515	-0.0138165	0.00421535	0.0112024	-0.0151065	0.00474397	0.000517568	-0.000340285	0.00635676	-0.00276496	-0.00215058	-0.0134275	-0.0136226	-0.00996526	-0.0157763	-0.015975	0.00209631	-0.0158679	0.00254397	-0.00708016	-0.0167647	-0.0160694	-0.0016829	-0.0149615	-0.0147318	-0.00479779		0.0074366	0.0113225	0.00828043	0.011112	0.0085221	0.0112887	0.00926373	0.00773885	0.0101813	0.0106916	0.00821341
0.0036364	-0.00907064	-0.0128303	-0.00980382	0.00219487	0.00210494	-0.0153316	-0.0287747	0.00684072	-0.00618435	-0.000934725	-0.0017741	-0.00509234	-0.0179984	0.00443247	0.0145618	-0.0186448	0.00685422	-0.000897984	-0.000938958	0.00712469	-0.0038607	-0.00283579	-0.0159381	-0.0152677	-0.0120006	-0.0192285	-0.0183578	0.00221411	-0.0188687	0.00298591	-0.00860322	-0.0213866	-0.0194976	-0.0026475	-0.0177239	-0.0178232	-0.00529177		0.01055	0.0163298	0.0116684	0.01602	0.0122844	0.0165801	0.0134841	0.0110085	0.0142833	0.0155082	0.0121165
0.00517129	-0.0104549	-0.0148421	-0.0107877	0.00378002	0.00290173	-0.0188265	-0.0334314	0.00956282	-0.0060445	0.000538659	-0.00206214	-0.00555632	-0.0224872	0.00448888	0.0183262	-0.0222389	0.0093922	-0.00278126	-0.00159395	0.00769093	-0.00509641	-0.00355666	-0.0184127	-0.0168936	-0.0140239	-0.0227886	-0.0206971	0.00230685	-0.0218316	0.00342791	-0.0101332	-0.0263676	-0.0229268	-0.00361304	-0.0203963	-0.0209015	-0.00564645		0.0142615	0.0215896	0.015693	0.0211742	0.0167695	0.0218716	0.0179232	0.0148847	0.0191016	0.0203249	0.0162256
0.00703576	-0.0117191	-0.016694	-0.0113745	0.0057428	0.00394427	-0.0223951	-0.0378633	0.0127537	-0.00540593	0.00245554	-0.00219321	-0.00583484	-0.0272121	0.0043594	0.0227405	-0.0258062	0.0123886	-0.00507655	-0.00241495	0.00807927	-0.00649137	-0.00435056	-0.0207793	-0.0181113	-0.0160307	-0.0266755	-0.0228356	0.00228439	-0.0247142	0.00378643	-0.0116995	-0.0317419	-0.0265677	-0.00488409	-0.0230151	-0.0240499	-0.00596538		0.0179731	0.0274438	0.0197176	0.0269045	0.0212546	0.0280713	0.0228738	0.0187609	0.02392	0.0266495	0.0208026
0.00923305	-0.0128239	-0.0183055	-0.0114839	0.00819835	0.00533506	-0.0258822	-0.0419215	0.0163637	-0.00403629	0.00487202	-0.00214321	-0.00590175	-0.0321002	0.00412723	0.0277025	-0.0292719	0.0160531	-0.00769711	-0.0035074	0.00832988	-0.00796076	-0.00512564	-0.0231406	-0.019322	-0.0180308	-0.0306413	-0.0246604	0.00227033	-0.0273723	0.0041361	-0.013297	-0.0372889	-0.0302149	-0.00620606	-0.0255912	-0.0271818	-0.00624319		0.0228342	0.0346357	0.0249592	0.0339311	0.0272564	0.0351793	0.0289754	0.0239218	0.0301916	0.0332254	0.0264322
0.0119279	-0.0136785	-0.0196108	-0.0109046	0.0111763	0.00705223	-0.0291217	-0.0455353	0.0207402	-0.00183573	0.00797177	-0.0018955	-0.00555851	-0.0370434	0.00385169	0.0331714	-0.0325407	0.0203619	-0.0105206	-0.00463285	0.00837233	-0.0095443	-0.00595581	-0.0253634	-0.0203482	-0.0199218	-0.0349898	-0.0264845	0.00219346	-0.0300197	0.00441884	-0.0148944	-0.0431994	-0.0340082	-0.00766364	-0.0281191	-0.0302748	-0.00651083		0.0278348	0.0418275	0.0303483	0.0409577	0.033442	0.0422873	0.0350769	0.0292384	0.0366393	0.0406001	0.0320619
0.0150787	-0.0141744	-0.0205451	-0.00953416	0.0145999	0.00914854	-0.0320047	-0.0485967	0.0256831	0.00116298	0.0115657	-0.00133263	-0.0048906	-0.0418719	0.00356591	0.0392787	-0.0354801	0.0253031	-0.0133904	-0.00609641	0.008331	-0.0111426	-0.00673811	-0.0275746	-0.0212916	-0.0218095	-0.0394607	-0.0279068	0.00211196	-0.0324051	0.00464154	-0.0165614	-0.0492022	-0.0378946	-0.00926658	-0.0306427	-0.0333836	-0.00680085		0.033057	0.0501945	0.0359523	0.0493455	0.0399277	0.050987	0.0421824	0.0348127	0.0433627	0.0488535	0.0387337
0.0186586	-0.0142825	-0.0210329	-0.00737183	0.0184784	0.0118012	-0.0343952	-0.0509998	0.0310987	0.00500155	0.0157073	-0.000380798	-0.00385358	-0.0464415	0.00338592	0.0461726	-0.0379616	0.0308985	-0.0161341	-0.00766051	0.00807888	-0.012827	-0.00752804	-0.029672	-0.0221796	-0.0235224	-0.0442591	-0.0292608	0.00205564	-0.034662	0.00483653	-0.0182032	-0.0554042	-0.041831	-0.0108984	-0.033137	-0.0363422	-0.00710724		0.0392292	0.0589667	0.0424778	0.0582025	0.0476992	0.0596868	0.049634	0.0414917	0.0512672	0.0572578	0.045765
0.0227956	-0.0139358	-0.0210105	-0.00435498	0.02288	0.0151111	-0.0359993	-0.0525884	0.0373069	0.00989347	0.0204789	0.000937296	-0.00222513	-0.0506191	0.00337784	0.0536685	-0.0398674	0.0373845	-0.0185613	-0.00940183	0.00778412	-0.014457	-0.00827303	-0.0317122	-0.0229565	-0.025179	-0.0492556	-0.0304785	0.00198591	-0.0368246	0.00490522	-0.0198904	-0.0616825	-0.045935	-0.0126872	-0.0356522	-0.0393134	-0.00746424		0.0454015	0.0680043	0.0490033	0.067339	0.0554706	0.0690372	0.0573092	0.0481708	0.0591717	0.0670964	0.0530183
0.0274701	-0.0130385	-0.0204162	-0.000401374	0.0278899	0.0190155	-0.0365978	-0.0533005	0.0441289	0.0159329	0.0257273	0.00268693	-0.000128322	-0.0542654	0.00358387	0.0617805	-0.0411269	0.0447088	-0.0204828	-0.0113919	0.00729204	-0.0161364	-0.00895375	-0.0336753	-0.0237431	-0.0266663	-0.0544859	-0.0314087	0.00197519	-0.0386679	0.00496709	-0.0215546	-0.0679729	-0.050039	-0.0144863	-0.0381671	-0.0420598	-0.00785452		0.0520809	0.0782556	0.0560122	0.0777528	0.0639319	0.0790382	0.0660062	0.0554657	0.0676804	0.0769349	0.0612867
0.0326268	-0.0114481	-0.0191658	0.00464181	0.0333608	0.0236351	-0.0362072	-0.0530547	0.0514253	0.0230231	0.0315218	0.00496771	0.00249776	-0.05718	0.00414234	0.0706794	-0.0416079	0.0528439	-0.0217086	-0.0134442	0.0067869	-0.0176949	-0.00960934	-0.0355195	-0.0243952	-0.0279893	-0.059965	-0.0323388	0.00198105	-0.0404643	0.00489365	-0.0232013	-0.0743094	-0.0542713	-0.0163578	-0.0407135	-0.0447397	-0.00829426		0.0592956	0.0885068	0.0635311	0.0881666	0.0731214	0.0890393	0.0747031	0.0634109	0.0768268	0.087814	0.0695552
0.0383493	-0.0090256	-0.0172008	0.0107315	0.0392771	0.0291161	-0.0346652	-0.0516464	0.0594581	0.0311168	0.0378417	0.00778956	0.00584254	-0.0590847	0.00522026	0.0802762	-0.0411982	0.0617686	-0.0220339	-0.0157765	0.00610921	-0.0192511	-0.0101455	-0.0373325	-0.0250549	-0.0292033	-0.0656147	-0.0329761	0.0020329	-0.0420416	0.00477801	-0.0249069	-0.0805075	-0.0585273	-0.0182613	-0.0432982	-0.0472202	-0.00876671		0.0665103	0.0994886	0.0710501	0.0993986	0.0823109	0.0999807	0.0839768	0.0713561	0.0859732	0.0991094	0.0784486
0.044619	-0.00580246	-0.0145385	0.0177916	0.0456656	0.0355497	-0.0317233	-0.0490475	0.0680756	0.0403393	0.0445837	0.0111329	0.00976753	-0.0599568	0.00678828	0.0904425	-0.0397945	0.0716662	-0.0212878	-0.0181963	0.00544204	-0.0206605	-0.0106739	-0.0389501	-0.0256418	-0.0301285	-0.0714786	-0.0335347	0.00214815	-0.0434141	0.00457683	-0.0265077	-0.0866818	-0.0628025	-0.0201679	-0.0459138	-0.0494701	-0.00926981		0.0743451	0.110927	0.0790442	0.111142	0.0924206	0.110922	0.093611	0.0801177	0.0958897	0.110826	0.0877327
0.0513674	-0.00174199	-0.0111242	0.0257928	0.0525564	0.042808	-0.0271939	-0.0452539	0.0771232	0.0506629	0.0518201	0.0150648	0.0143411	-0.0597	0.00889846	0.101217	-0.0373478	0.0823962	-0.0193324	-0.0207566	0.00461535	-0.0220058	-0.0110573	-0.0405568	-0.0261816	-0.031006	-0.0774723	-0.0340144	0.00227739	-0.044726	0.00427065	-0.0281391	-0.0926032	-0.0671142	-0.0220873	-0.0486107	-0.0515696	-0.00978568		0.0823511	0.122409	0.0871693	0.12294	0.102784	0.122118	0.103277	0.0891046	0.106019	0.123387	0.0970543
0.0586383	0.00327417	-0.00697624	0.0347928	0.059844	0.0510511	-0.0212396	-0.0402091	0.0867893	0.0619999	0.0594549	0.0196062	0.0196681	-0.0582608	0.0118097	0.112651	-0.0338262	0.0938914	-0.0159903	-0.0235016	0.00380874	-0.0232215	-0.0114437	-0.0419579	-0.0266947	-0.0315538	-0.0836244	-0.0342641	0.00249868	-0.0457972	0.00391436	-0.0297144	-0.0983904	-0.071395	-0.0240068	-0.0513382	-0.0533431	-0.01031		0.0904065	0.134702	0.0953217	0.135753	0.113216	0.133569	0.113537	0.0981517	0.116203	0.135947	0.107072
0.0663909	0.009275	-0.00197317	0.0447545	0.0674666	0.0602624	-0.0138017	-0.0338058	0.0969529	0.0742421	0.067432	0.024719	0.0256219	-0.0554367	0.0155158	0.124569	-0.0291993	0.1061	-0.0112164	-0.0262827	0.00286294	-0.0243114	-0.0116929	-0.0433207	-0.0271062	-0.0320833	-0.0898473	-0.0345142	0.00270831	-0.046793	0.0034431	-0.0312189	-0.103872	-0.0756401	-0.0258612	-0.0541807	-0.054982	-0.0108133		0.0990225	0.146996	0.103784	0.148565	0.124419	0.14502	0.123796	0.107881	0.127012	0.149444	0.117089
0.0745773	0.0163398	0.00373979	0.0555427	0.0754164	0.0705315	-0.00483706	-0.0259776	0.107471	0.0873937	0.0758119	0.0304426	0.0322642	-0.0510824	0.0199379	0.136928	-0.0234951	0.119074	-0.00494656	-0.0292304	0.00192507	-0.0252996	-0.0119569	-0.0445093	-0.0275134	-0.0323035	-0.0961935	-0.0345918	0.00300241	-0.0476969	0.00292812	-0.0327642	-0.109121	-0.0798726	-0.0277206	-0.0570587	-0.0562683	-0.0113105		0.107639	0.159574	0.112245	0.161713	0.135622	0.156488	0.134216	0.117609	0.137822	0.162989	0.127292
0.0831946	0.0243428	0.0101896	0.0670673	0.0836856	0.0816901	0.00575444	-0.0168958	0.118456	0.101365	0.0844603	0.0367195	0.0395951	-0.0453246	0.0251965	0.149733	-0.0166847	0.132647	0.0027963	-0.0322254	0.000863508	-0.0261373	-0.0121122	-0.0456054	-0.0278023	-0.0324942	-0.102554	-0.0346051	0.00328954	-0.0484486	0.00229974	-0.0341464	-0.114031	-0.0839492	-0.0294993	-0.0600833	-0.0573988	-0.011758		0.11638	0.172452	0.120698	0.175215	0.146983	0.167956	0.144805	0.127484	0.148757	0.176876	0.137692
0.092197	0.0332632	0.0173331	0.0792617	0.0922104	0.093819	0.0177534	-0.00653819	0.129821	0.116071	0.0933707	0.0435387	0.0475419	-0.0382651	0.0314122	0.16291	-0.00883617	0.146733	0.0120285	-0.0352589	-0.000254545	-0.026864	-0.0122781	-0.0465942	-0.0280653	-0.0325139	-0.108988	-0.0345784	0.0035937	-0.0491916	0.00160588	-0.0355317	-0.118646	-0.0880078	-0.031245	-0.0631514	-0.0582417	-0.012201		0.125327	0.18533	0.129136	0.188717	0.158606	0.179196	0.155394	0.1376	0.159898	0.191019	0.148092
0.101533	0.0431097	0.0251272	0.0920914	0.100917	0.106792	0.0310788	0.0050574	0.141442	0.131391	0.102534	0.0509134	0.0560835	-0.0299108	0.0384767	0.176367	8.74677e-06	0.161255	0.0226922	-0.0383883	-0.00146809	-0.0275046	-0.0123795	-0.0474344	-0.0282544	-0.0324534	-0.115383	-0.0344331	0.00390861	-0.0498474	0.000822933	-0.0368708	-0.122907	-0.0919053	-0.0329455	-0.0663931	-0.058931	-0.0125845		0.134273	0.198383	0.137573	0.202441	0.170228	0.190207	0.165953	0.147716	0.171039	0.205185	0.158474
0.11119	0.0537989	0.0335433	0.105462	0.109782	0.12066	0.0456088	0.0178458	0.153372	0.147277	0.111861	0.0587555	0.0651958	-0.0202376	0.046277	0.190056	0.00980453	0.176199	0.0346549	-0.0414855	-0.00284373	-0.0279985	-0.0124931	-0.0482331	-0.0283726	-0.0323567	-0.12182	-0.0342818	0.00418562	-0.0504788	-1.13506e-05	-0.0381057	-0.126856	-0.0956987	-0.0345474	-0.0696895	-0.0593981	-0.0129888		0.143254	0.211452	0.14576	0.216183	0.181815	0.201219	0.176509	0.157811	0.18215	0.219443	0.168856
0.12111	0.0653402	0.0425217	0.119252	0.118782	0.135264	0.0613862	0.0317419	0.165545	0.163615	0.121348	0.0670545	0.0748338	-0.00918084	0.0549932	0.203951	0.0204287	0.191419	0.0478084	-0.0446219	-0.0042874	-0.0284839	-0.012587	-0.0488507	-0.0284521	-0.0321669	-0.128181	-0.0340593	0.00446347	-0.051124	-0.000927379	-0.0393463	-0.130441	-0.0993981	-0.0361397	-0.0731803	-0.0597537	-0.0133451		0.152252	0.224461	0.153827	0.229858	0.193383	0.211367	0.186945	0.167895	0.193247	0.233702	0.17909
0.13125	0.0775603	0.0519991	0.133377	0.127867	0.15057	0.0781964	0.0466305	0.177868	0.180323	0.13095	0.0757699	0.0849131	0.00294303	0.0645139	0.217958	0.0318222	0.206832	0.0620312	-0.0477666	-0.00599756	-0.0288357	-0.0126963	-0.0494454	-0.0284514	-0.032027	-0.134536	-0.0338043	0.00467875	-0.0517651	-0.00189026	-0.0405025	-0.133719	-0.102918	-0.0376265	-0.0767498	-0.0599745	-0.0137645		0.161249	0.237365	0.161893	0.243413	0.204952	0.221516	0.197166	0.17798	0.204345	0.247614	0.189061
0.141587	0.0904157	0.0618856	0.147772	0.136988	0.166426	0.0958851	0.06239	0.190349	0.197299	0.140618	0.0848805	0.0954038	0.0160368	0.0747196	0.232027	0.0438889	0.222367	0.0772109	-0.0508306	-0.00777557	-0.0292195	-0.0128284	-0.0499153	-0.028425	-0.0318566	-0.140817	-0.033535	0.00486769	-0.0524557	-0.00291663	-0.0416249	-0.136735	-0.106403	-0.0390921	-0.0805046	-0.0601649	-0.0141702		0.170016	0.250268	0.16928	0.256967	0.216004	0.231092	0.207386	0.187597	0.215046	0.261444	0.199032
0.152053	0.103797	0.0721365	0.162358	0.146117	0.182851	0.114294	0.0789378	0.202927	0.214467	0.150331	0.0942977	0.106255	0.030036	0.0855762	0.246105	0.0565625	0.237946	0.0931738	-0.053906	-0.00986166	-0.0295561	-0.0129811	-0.0503479	-0.028343	-0.0317842	-0.147033	-0.0332302	0.00499375	-0.0531593	-0.00402321	-0.0427414	-0.139441	-0.109685	-0.0404996	-0.0843701	-0.0603324	-0.0146917		0.178777	0.262716	0.176648	0.270026	0.227041	0.240097	0.217078	0.197201	0.225736	0.274868	0.208394
0.162622	0.117607	0.0827265	0.177056	0.155224	0.199674	0.133356	0.0961499	0.215551	0.23173	0.160042	0.103991	0.117371	0.0448677	0.0970778	0.260129	0.0697479	0.253484	0.109757	-0.0569033	-0.0120434	-0.0299339	-0.0131869	-0.0506936	-0.0282277	-0.0317644	-0.153178	-0.0329206	0.00506209	-0.0539717	-0.00515423	-0.0438017	-0.141996	-0.112947	-0.0418549	-0.0884056	-0.0605566	-0.0152291		0.187386	0.275046	0.183768	0.282957	0.237816	0.249102	0.226633	0.20656	0.236224	0.287749	0.217599
0.173256	0.131786	0.0935571	0.19179	0.164268	0.216808	0.152899	0.113961	0.228193	0.249009	0.169727	0.113945	0.128713	0.0604545	0.109101	0.274052	0.0833475	0.268913	0.126815	-0.0598346	-0.0145156	-0.0303551	-0.0134274	-0.0509986	-0.02809	-0.0318428	-0.159225	-0.0325981	0.0050675	-0.0548507	-0.00637024	-0.0448671	-0.144253	-0.116071	-0.0431955	-0.0925792	-0.060865	-0.0159441		0.195584	0.28717	0.190216	0.295659	0.247887	0.256792	0.235991	0.215258	0.246165	0.300565	0.226557
0.183901	0.146193	0.104559	0.206498	0.173223	0.234154	0.172779	0.132204	0.240804	0.266232	0.179347	0.124083	0.140221	0.0765658	0.12155	0.28783	0.0972686	0.284179	0.144182	-0.0627168	-0.0171122	-0.0308357	-0.0137422	-0.0512431	-0.0279127	-0.0320606	-0.165203	-0.0322707	0.00500041	-0.0558048	-0.00759774	-0.0459412	-0.146475	-0.119174	-0.0444766	-0.096903	-0.061328	-0.0166913		0.203782	0.298607	0.196663	0.307598	0.257958	0.264482	0.244695	0.223956	0.256106	0.312076	0.234695
0.194531	0.160739	0.11568	0.221109	0.182071	0.251652	0.192847	0.15079	0.253359	0.283314	0.188866	0.13436	0.15181	0.0931057	0.134408	0.301388	0.111432	0.299164	0.161702	-0.0654842	-0.0199286	-0.0314164	-0.0141044	-0.0514461	-0.0277178	-0.0323838	-0.171055	-0.0319446	0.00485721	-0.0568882	-0.00889292	-0.0470222	-0.148427	-0.122211	-0.0457478	-0.101384	-0.0619767	-0.017678		0.211517	0.310044	0.202459	0.319537	0.267288	0.271479	0.2534	0.231968	0.265457	0.323587	0.242832
0.205099	0.175316	0.126877	0.235572	0.190784	0.269178	0.212981	0.169618	0.26581	0.300188	0.198279	0.144741	0.163438	0.10999	0.147555	0.314696	0.125764	0.313844	0.179238	-0.0681868	-0.0228757	-0.0320925	-0.0145661	-0.0516056	-0.0275013	-0.0328784	-0.176844	-0.0316262	0.00464554	-0.0580189	-0.010224	-0.0481277	-0.150435	-0.125225	-0.0470003	-0.105995	-0.0628496	-0.0187075		0.218899	0.320685	0.207758	0.330644	0.276054	0.277782	0.2614	0.239457	0.27436	0.334	0.250109
0.215573	0.189842	0.138076	0.24984	0.199339	0.286655	0.23305	0.188585	0.27812	0.316796	0.207521	0.155176	0.175029	0.12709	0.160901	0.327724	0.140178	0.328176	0.196658	-0.0707809	-0.0259286	-0.0328802	-0.0150786	-0.0517279	-0.0272512	-0.0335035	-0.182493	-0.0313115	0.00434076	-0.0593176	-0.0115936	-0.0492971	-0.152247	-0.128253	-0.0482315	-0.110762	-0.0639832	-0.0200071		0.226281	0.330927	0.213057	0.341334	0.28482	0.284085	0.269049	0.246946	0.283262	0.343865	0.256956
0.225933	0.204214	0.149225	0.263859	0.2077	0.304022	0.252927	0.207589	0.290285	0.333072	0.216577	0.165623	0.186527	0.144312	0.174383	0.340426	0.154596	0.342112	0.213854	-0.0732614	-0.0290838	-0.0338342	-0.0157209	-0.051816	-0.02698	-0.0343078	-0.188054	-0.0310113	0.00396414	-0.0606957	-0.0130139	-0.0505088	-0.154162	-0.131225	-0.0494617	-0.115645	-0.0654255	-0.0213737		0.23274	0.341019	0.21731	0.351879	0.292261	0.288991	0.276579	0.253221	0.291072	0.353223	0.263656
0.236115	0.218347	0.160288	0.27758	0.215875	0.321163	0.272519	0.226537	0.302242	0.348939	0.225462	0.17604	0.197894	0.161529	0.187927	0.352736	0.168949	0.355517	0.230714	-0.0756358	-0.0322275	-0.0348902	-0.0164085	-0.051866	-0.0266708	-0.0352671	-0.19348	-0.0307333	0.00349316	-0.0621532	-0.0144636	-0.0517867	-0.155984	-0.134295	-0.0506898	-0.120656	-0.0671297	-0.0229816		0.239055	0.349797	0.2214	0.361155	0.299494	0.293898	0.283064	0.259306	0.298712	0.361315	0.269074
0.246114	0.232172	0.171212	0.29097	0.223842	0.338012	0.291707	0.24535	0.313965	0.364366	0.234073	0.186383	0.209028	0.178656	0.201435	0.364645	0.183166	0.368427	0.247158	-0.077904	-0.0353914	-0.0361094	-0.0172545	-0.0518999	-0.0263291	-0.0363618	-0.19878	-0.0304654	0.00293637	-0.0637756	-0.0159429	-0.0531949	-0.157945	-0.137304	-0.0519061	-0.125764	-0.0691732	-0.0246828		0.24517	0.358575	0.225281	0.370431	0.30646	0.298125	0.289549	0.265147	0.306122	0.369406	0.274493
0.255914	0.245619	0.181919	0.303981	0.231588	0.354553	0.310363	0.263936	0.325465	0.379306	0.242426	0.196624	0.219916	0.195583	0.214857	0.376141	0.197188	0.380791	0.263114	-0.0800601	-0.0384613	-0.037465	-0.0181553	-0.0518824	-0.0259534	-0.0376541	-0.203924	-0.0302274	0.00227634	-0.0654314	-0.0174713	-0.0546594	-0.159894	-0.140448	-0.0531569	-0.13097	-0.0714998	-0.0265804		0.250251	0.366527	0.228082	0.37888	0.312044	0.301672	0.295401	0.269728	0.312344	0.37589	0.279104
0.265441	0.258656	0.192393	0.316614	0.239067	0.370723	0.328393	0.282217	0.336667	0.393693	0.250553	0.206722	0.230524	0.212251	0.228109	0.387145	0.210965	0.392574	0.278523	-0.0820872	-0.0414374	-0.0389282	-0.0192021	-0.0518781	-0.0255319	-0.0390254	-0.208925	-0.0300068	0.00151484	-0.0672177	-0.019017	-0.0562552	-0.161985	-0.14358	-0.054387	-0.136231	-0.0741032	-0.0285799		0.255333	0.373772	0.230883	0.38662	0.317629	0.30522	0.300711	0.274308	0.318567	0.382205	0.283024
0.274705	0.27116	0.202615	0.328819	0.246296	0.386385	0.345758	0.300091	0.347557	0.407472	0.258306	0.216625	0.240717	0.228529	0.241131	0.397657	0.224453	0.403629	0.293325	-0.0840025	-0.0442516	-0.040566	-0.0203375	-0.0518058	-0.0250946	-0.0406176	-0.213712	-0.0298116	0.000645444	-0.0690573	-0.0205946	-0.0579887	-0.164134	-0.146762	-0.0556503	-0.141559	-0.0770072	-0.0307235		0.259826	0.381016	0.233119	0.394361	0.322447	0.307476	0.306021	0.278184	0.3241	0.387637	0.286944
0.283697	0.283104	0.212539	0.340537	0.253269	0.401541	0.362378	0.317523	0.358154	0.420621	0.265736	0.226323	0.250536	0.244386	0.253852	0.407661	0.2376	0.414022	0.307491	-0.0857715	-0.0468805	-0.0422681	-0.0215925	-0.0517684	-0.0245965	-0.0422964	-0.218333	-0.0296628	-0.000384714	-0.0709681	-0.0222026	-0.0598078	-0.166426	-0.150007	-0.0569284	-0.146892	-0.0801484	-0.0329644		0.263627	0.386665	0.234692	0.400596	0.326364	0.309732	0.310145	0.28123	0.328824	0.392267	0.28943
0.292333	0.294482	0.222114	0.351782	0.25996	0.416197	0.378069	0.334438	0.368371	0.433111	0.272868	0.235791	0.25993	0.25973	0.266238	0.417157	0.250347	0.42372	0.320977	-0.0874474	-0.0493102	-0.0441419	-0.0229645	-0.0516856	-0.0241089	-0.04413	-0.222692	-0.0295299	-0.00149957	-0.0729808	-0.0238035	-0.061858	-0.168811	-0.153223	-0.0582082	-0.152249	-0.0835124	-0.0352991		0.267429	0.392272	0.236264	0.406791	0.330281	0.311382	0.314239	0.284276	0.333547	0.396678	0.291878
0.300648	0.305241	0.231295	0.362496	0.266352	0.43029	0.392851	0.350766	0.378209	0.444897	0.279574	0.24495	0.268776	0.274473	0.278172	0.426022	0.262668	0.432677	0.333746	-0.0890022	-0.0514914	-0.0460561	-0.0244353	-0.0516358	-0.0235732	-0.0460826	-0.226852	-0.0294346	-0.00281149	-0.075011	-0.0254617	-0.0640014	-0.171345	-0.156521	-0.0595575	-0.157571	-0.0870618	-0.0377221		0.270193	0.397189	0.236926	0.412357	0.332975	0.312425	0.317863	0.286198	0.337125	0.399778	0.293757
0.308608	0.31539	0.240096	0.372705	0.272422	0.44365	0.406647	0.366433	0.38768	0.455887	0.285873	0.253809	0.277122	0.288611	0.289643	0.434338	0.274545	0.440715	0.345741	-0.0904362	-0.0534639	-0.0480841	-0.0260408	-0.0515759	-0.0230691	-0.0481447	-0.230723	-0.0293725	-0.00422993	-0.0771263	-0.0270876	-0.066269	-0.173982	-0.159773	-0.0608857	-0.162858	-0.0907632	-0.0401977		0.272625	0.401115	0.237294	0.417019	0.335276	0.313468	0.320813	0.287758	0.340336	0.402877	0.294818
0.316158	0.324758	0.248499	0.382317	0.278195	0.45636	0.419462	0.381372	0.396703	0.466128	0.291799	0.262355	0.284912	0.301965	0.300615	0.44207	0.285931	0.447961	0.356898	-0.0917579	-0.0551663	-0.0501587	-0.0277288	-0.0515402	-0.0225586	-0.0503374	-0.234339	-0.0293421	-0.00582819	-0.07925	-0.0287524	-0.0687655	-0.176769	-0.163031	-0.0622952	-0.168085	-0.0945893	-0.0427565		0.27499	0.40504	0.237604	0.421681	0.337495	0.313381	0.323763	0.289243	0.343466	0.404935	0.295879
0.323329	0.333413	0.256443	0.391339	0.283628	0.46838	0.431008	0.395535	0.405278	0.475544	0.297258	0.270514	0.292048	0.314564	0.310968	0.44915	0.296821	0.454343	0.367166	-0.0929389	-0.0566774	-0.0522685	-0.0295603	-0.0515361	-0.0220809	-0.052627	-0.237689	-0.0293649	-0.00758637	-0.0814431	-0.030401	-0.0713646	-0.179651	-0.166263	-0.0637177	-0.173209	-0.0985063	-0.0453398		0.276199	0.407597	0.236885	0.425066	0.338278	0.313294	0.325805	0.289401	0.345202	0.406667	0.29586
0.330057	0.34133	0.263937	0.399727	0.288737	0.479706	0.441451	0.408908	0.413409	0.484168	0.302219	0.278261	0.298569	0.32633	0.3207	0.455585	0.307103	0.459874	0.376533	-0.0940342	-0.0579397	-0.0544288	-0.0314589	-0.0515532	-0.021656	-0.0550448	-0.240714	-0.0294142	-0.00948642	-0.0836668	-0.0320401	-0.0741499	-0.182692	-0.169444	-0.0651843	-0.178264	-0.102496	-0.048011		0.277407	0.409905	0.236166	0.428219	0.339062	0.312684	0.327682	0.289559	0.346937	0.40793	0.295644
0.336338	0.348472	0.270911	0.407449	0.293442	0.490056	0.450621	0.421325	0.421032	0.491811	0.306725	0.285599	0.304412	0.337192	0.329726	0.461355	0.316774	0.464271	0.384956	-0.095031	-0.0590491	-0.0565692	-0.0335041	-0.0516398	-0.0212625	-0.0575712	-0.243514	-0.0294994	-0.0116035	-0.0859056	-0.0336942	-0.0770821	-0.185806	-0.172585	-0.0667269	-0.183149	-0.106529	-0.0506904		0.278173	0.41176	0.235083	0.430962	0.339354	0.311551	0.329273	0.289262	0.348184	0.408431	0.295104
0.342181	0.35485	0.277426	0.414531	0.297808	0.499633	0.458629	0.432872	0.428134	0.498634	0.310734	0.292545	0.309524	0.347168	0.338102	0.466521	0.325846	0.467767	0.392391	-0.095918	-0.0599682	-0.0587427	-0.0355991	-0.0517554	-0.020983	-0.0602158	-0.245932	-0.0296337	-0.0138228	-0.0882115	-0.0352887	-0.0801171	-0.189102	-0.175673	-0.068268	-0.187968	-0.110596	-0.0534724		0.278123	0.412461	0.233328	0.43266	0.338739	0.310418	0.330139	0.288127	0.348529	0.408932	0.29374
0.347491	0.360219	0.283388	0.420818	0.30177	0.508314	0.465046	0.443309	0.434709	0.50447	0.314148	0.298894	0.313913	0.356004	0.345545	0.470849	0.334233	0.470225	0.398768	-0.0967008	-0.060778	-0.0608652	-0.0378444	-0.0519771	-0.0207724	-0.0630089	-0.248129	-0.0298033	-0.0163158	-0.090509	-0.0369128	-0.0833874	-0.192459	-0.178675	-0.0699542	-0.192558	-0.114671	-0.0562568		0.278072	0.413162	0.231573	0.434358	0.338125	0.308318	0.331004	0.286993	0.348875	0.408313	0.292376
0.352325	0.364749	0.288861	0.426403	0.30537	0.516155	0.470195	0.452771	0.440719	0.509442	0.317018	0.304797	0.317515	0.363842	0.352239	0.474537	0.341952	0.471728	0.404063	-0.0973922	-0.0614895	-0.0629807	-0.0401307	-0.0522653	-0.0207093	-0.0659278	-0.249965	-0.0300251	-0.018923	-0.0928752	-0.0384671	-0.0867781	-0.19602	-0.181634	-0.0716527	-0.197074	-0.118757	-0.0591579		0.27734	0.412731	0.229238	0.435062	0.336689	0.306218	0.331226	0.285088	0.348387	0.407695	0.290278
0.356629	0.368365	0.29374	0.431197	0.308502	0.5228	0.47385	0.46103	0.446116	0.513318	0.319346	0.310188	0.320312	0.370554	0.35803	0.477489	0.348917	0.471942	0.408232	-0.0979988	-0.0621623	-0.0650426	-0.0425331	-0.0526482	-0.0207679	-0.0689828	-0.251594	-0.0302869	-0.0217384	-0.0952539	-0.0400128	-0.090287	-0.199631	-0.184534	-0.0734543	-0.201355	-0.122833	-0.0620663		0.276239	0.411855	0.226588	0.435375	0.334808	0.303684	0.331196	0.282767	0.347448	0.406424	0.287892
0.360369	0.37104	0.298067	0.435167	0.311228	0.528492	0.476111	0.468173	0.450931	0.516256	0.321032	0.315007	0.32233	0.376107	0.362917	0.479692	0.355028	0.471114	0.411227	-0.0985475	-0.0628244	-0.0670692	-0.0449792	-0.0531419	-0.0209755	-0.0721908	-0.252943	-0.03058	-0.0247133	-0.0976593	-0.0415208	-0.0939403	-0.203455	-0.187391	-0.0753356	-0.205542	-0.126914	-0.0650953		0.275137	0.410754	0.223938	0.435483	0.332927	0.300716	0.331039	0.280446	0.346509	0.404753	0.285366
0.363582	0.372738	0.301786	0.438303	0.313498	0.533153	0.476628	0.474094	0.455109	0.518164	0.322054	0.319205	0.323444	0.380487	0.366757	0.481089	0.360356	0.469168	0.412954	-0.09901	-0.0635105	-0.0690417	-0.0475092	-0.053733	-0.0213655	-0.0755339	-0.254071	-0.0309389	-0.0278566	-0.100137	-0.0429756	-0.0977552	-0.207348	-0.190227	-0.0772765	-0.209499	-0.130993	-0.0681426		0.273099	0.408419	0.220529	0.434467	0.329965	0.297748	0.330186	0.277084	0.344468	0.402846	0.282076
0.366168	0.373261	0.304938	0.440513	0.315341	0.536756	0.47567	0.478719	0.458579	0.519087	0.322497	0.322838	0.323701	0.383476	0.369636	0.481731	0.364823	0.466138	0.413368	-0.0993881	-0.0642606	-0.0709703	-0.0500842	-0.0544644	-0.0219286	-0.0790572	-0.254997	-0.0313431	-0.0311848	-0.102603	-0.0444109	-0.101675	-0.211453	-0.193036	-0.0793654	-0.213344	-0.13508	-0.0713055		0.271007	0.406084	0.217077	0.43345	0.326942	0.294006	0.329334	0.273662	0.342364	0.400181	0.278785
0.368169	0.372778	0.307504	0.441875	0.316686	0.539005	0.473119	0.482003	0.461416	0.518896	0.322261	0.325868	0.323141	0.385237	0.371499	0.481628	0.368412	0.461769	0.412454	-0.099742	-0.0650952	-0.0728489	-0.0527086	-0.0553082	-0.0227126	-0.0827203	-0.255713	-0.0317976	-0.0346553	-0.105149	-0.0457684	-0.105751	-0.215655	-0.195861	-0.0814986	-0.21697	-0.139181	-0.0744976		0.268709	0.40292	0.213455	0.431692	0.32367	0.290263	0.328055	0.269999	0.340008	0.397517	0.275027
0.369591	0.3712	0.309403	0.442268	0.31753	0.540087	0.468964	0.483918	0.463544	0.517653	0.321236	0.328176	0.321577	0.385612	0.372172	0.480617	0.371055	0.45624	0.410202	-0.100025	-0.06605	-0.0746879	-0.0553769	-0.0563043	-0.0237365	-0.0865804	-0.256289	-0.0323149	-0.0383219	-0.107701	-0.0470923	-0.10993	-0.220055	-0.198704	-0.0838057	-0.220474	-0.143306	-0.077792		0.265768	0.399178	0.209308	0.429417	0.319628	0.286179	0.32648	0.265586	0.336864	0.394062	0.270942
0.3703	0.368525	0.31064	0.441717	0.317866	0.540028	0.463011	0.484457	0.464877	0.515371	0.319604	0.329843	0.319124	0.384589	0.371766	0.478831	0.37268	0.449552	0.406578	-0.100291	-0.0671424	-0.0764879	-0.0580603	-0.0574528	-0.0249732	-0.0906121	-0.256697	-0.0328626	-0.0421224	-0.110309	-0.0483493	-0.114192	-0.224594	-0.201609	-0.0861973	-0.223774	-0.14746	-0.0811236		0.262827	0.395403	0.205161	0.427113	0.315587	0.281753	0.324889	0.261174	0.33372	0.390475	0.266839
0.370409	0.364661	0.311234	0.44011	0.317705	0.538688	0.455446	0.483601	0.465533	0.512027	0.317273	0.330854	0.315836	0.382214	0.370209	0.476229	0.373277	0.441697	0.40155	-0.100521	-0.0683892	-0.0782694	-0.0607819	-0.058723	-0.0265165	-0.0948109	-0.257028	-0.0335053	-0.0461016	-0.112976	-0.049556	-0.118674	-0.2293	-0.204566	-0.0887104	-0.226947	-0.151655	-0.0845391		0.259504	0.390372	0.200718	0.423701	0.311059	0.277326	0.322691	0.256284	0.330085	0.386493	0.262051
0.369876	0.3595	0.31121	0.437479	0.317022	0.535845	0.446278	0.481181	0.465407	0.507579	0.314029	0.331103	0.311463	0.378241	0.3675	0.472787	0.372844	0.432481	0.395058	-0.100696	-0.0698196	-0.08002	-0.0634893	-0.0602335	-0.0282601	-0.0992613	-0.257233	-0.0342179	-0.0502388	-0.115638	-0.0507024	-0.123198	-0.2342	-0.207633	-0.091371	-0.229936	-0.155894	-0.0879961		0.255855	0.38534	0.196025	0.420288	0.306117	0.27232	0.320494	0.250987	0.326031	0.382076	0.257263
0.368585	0.353196	0.310516	0.433858	0.315736	0.531705	0.435369	0.477265	0.464427	0.502039	0.310167	0.330627	0.306194	0.37286	0.363502	0.46844	0.371323	0.422079	0.387089	-0.100906	-0.0714319	-0.0817834	-0.0662149	-0.0618282	-0.0302921	-0.103831	-0.257421	-0.0349835	-0.0545246	-0.118373	-0.0518045	-0.127851	-0.239212	-0.210769	-0.0941128	-0.232803	-0.160202	-0.0915184		0.252206	0.3798	0.191332	0.416404	0.301176	0.267313	0.318045	0.245691	0.321978	0.377592	0.2522
0.366658	0.34567	0.309056	0.429133	0.313897	0.526323	0.422705	0.471808	0.462729	0.495449	0.305551	0.329446	0.300061	0.365893	0.358386	0.46328	0.36867	0.410478	0.377616	-0.101086	-0.0732466	-0.0835334	-0.0689213	-0.0636686	-0.0325827	-0.108649	-0.257552	-0.0358548	-0.0589559	-0.121115	-0.0528254	-0.132646	-0.244488	-0.214079	-0.0970751	-0.235506	-0.16454	-0.0950844		0.248035	0.373668	0.186262	0.411968	0.295593	0.262062	0.315303	0.239766	0.317275	0.372466	0.246817
0.364066	0.336907	0.306887	0.423322	0.311492	0.519495	0.408372	0.46485	0.460189	0.487818	0.300013	0.327471	0.292853	0.357423	0.351988	0.457263	0.364841	0.397705	0.366617	-0.101284	-0.0752564	-0.0853384	-0.0716113	-0.0656129	-0.0351343	-0.113604	-0.257719	-0.0367696	-0.063532	-0.123898	-0.0538144	-0.137465	-0.249807	-0.217517	-0.100117	-0.238101	-0.168955	-0.0987003		0.243764	0.367535	0.181119	0.407532	0.289887	0.256567	0.312562	0.23372	0.312447	0.36734	0.241433
0.360682	0.326882	0.304077	0.416386	0.308529	0.511072	0.392472	0.456344	0.456752	0.479077	0.29381	0.32472	0.284735	0.347498	0.344307	0.450322	0.359845	0.383567	0.354059	-0.101503	-0.0775131	-0.0871504	-0.0742859	-0.0677927	-0.0379643	-0.11878	-0.257892	-0.0378085	-0.0682568	-0.126723	-0.054741	-0.142502	-0.255456	-0.221105	-0.103341	-0.240561	-0.173403	-0.102364		0.239431	0.36053	0.175937	0.402269	0.284095	0.251071	0.309416	0.227591	0.307533	0.361796	0.235593
0.356632	0.315489	0.300567	0.408326	0.304921	0.50134	0.374857	0.446152	0.452572	0.469281	0.286813	0.321209	0.275747	0.335873	0.335394	0.442516	0.353599	0.368269	0.33998	-0.101722	-0.0799306	-0.0890469	-0.0769192	-0.0701054	-0.0410131	-0.12412	-0.258144	-0.0389692	-0.073101	-0.129544	-0.0556192	-0.147603	-0.261089	-0.224928	-0.106706	-0.242929	-0.177891	-0.106067		0.2347	0.353426	0.170501	0.396912	0.277755	0.24518	0.306225	0.22093	0.302072	0.356086	0.2297
0.351902	0.302881	0.296312	0.39917	0.300702	0.490267	0.355579	0.434395	0.447504	0.458471	0.278909	0.31691	0.265727	0.322717	0.325286	0.433872	0.346131	0.351824	0.32436	-0.102013	-0.0826607	-0.0910067	-0.07954	-0.0726336	-0.0443781	-0.129641	-0.25849	-0.0401849	-0.0781067	-0.132403	-0.0564843	-0.152775	-0.267106	-0.228858	-0.110199	-0.245197	-0.182397	-0.109828		0.229968	0.346074	0.165065	0.391291	0.271416	0.239289	0.302912	0.21427	0.296612	0.35022	0.223669
0.346379	0.289036	0.291264	0.388868	0.295862	0.477786	0.334659	0.42107	0.441514	0.446643	0.270307	0.311781	0.254808	0.307958	0.313907	0.424356	0.337373	0.334217	0.307183	-0.102323	-0.0855398	-0.0930451	-0.0821137	-0.0753533	-0.0479196	-0.135356	-0.258922	-0.0415764	-0.0832309	-0.135281	-0.0572833	-0.158136	-0.273093	-0.233078	-0.11389	-0.24739	-0.186933	-0.113627		0.22508	0.338227	0.159546	0.385143	0.264859	0.233241	0.299357	0.207399	0.290934	0.344046	0.217357
0.34017	0.273891	0.285563	0.377376	0.290429	0.463714	0.312262	0.406171	0.434772	0.433745	0.26089	0.305865	0.24304	0.291722	0.301206	0.413886	0.327341	0.315304	0.288497	-0.102706	-0.0887521	-0.0952184	-0.0846745	-0.0782153	-0.0517352	-0.141177	-0.25954	-0.0430327	-0.0884823	-0.138158	-0.0581072	-0.163505	-0.279427	-0.237398	-0.117654	-0.249531	-0.191438	-0.117491		0.219987	0.33038	0.153919	0.378995	0.258016	0.227038	0.295803	0.200253	0.28497	0.337871	0.211046
0.333283	0.257542	0.279161	0.364782	0.284369	0.448403	0.288302	0.389716	0.427115	0.419881	0.250607	0.299163	0.230311	0.274025	0.287368	0.40258	0.316034	0.295324	0.268286	-0.103158	-0.092143	-0.0974607	-0.0872043	-0.0813671	-0.0557565	-0.147226	-0.260257	-0.0446404	-0.09389	-0.141059	-0.0588741	-0.169054	-0.285782	-0.242029	-0.121661	-0.251618	-0.195955	-0.121403		0.214893	0.322116	0.148291	0.372365	0.251172	0.220835	0.292023	0.193107	0.279007	0.331356	0.204475
0.325621	0.239866	0.272042	0.351051	0.277645	0.43176	0.262821	0.37162	0.418529	0.405047	0.23961	0.291576	0.216721	0.254655	0.272323	0.390429	0.303417	0.274278	0.246567	-0.103675	-0.0958709	-0.0999054	-0.0897201	-0.0845935	-0.0600073	-0.153341	-0.261231	-0.0464477	-0.0993793	-0.143977	-0.0596574	-0.174712	-0.292405	-0.246855	-0.125756	-0.253695	-0.200389	-0.125384		0.209635	0.313726	0.142614	0.36559	0.244059	0.214399	0.288176	0.185709	0.272779	0.324824	0.197827
0.31727	0.221023	0.26415	0.336171	0.270268	0.413821	0.235808	0.352026	0.4092	0.389255	0.227803	0.283202	0.202327	0.233746	0.256014	0.37737	0.289459	0.252153	0.223412	-0.104298	-0.0998055	-0.10242	-0.0922417	-0.088156	-0.0644357	-0.159641	-0.262332	-0.0483015	-0.10505	-0.146876	-0.0604592	-0.180389	-0.29911	-0.251831	-0.130002	-0.255751	-0.204786	-0.12943		0.204317	0.305266	0.136919	0.358715	0.236846	0.207963	0.284286	0.17822	0.266454	0.31814	0.191127
0.30824	0.201019	0.25558	0.320148	0.262292	0.394484	0.207477	0.330926	0.398947	0.372495	0.215177	0.274061	0.187068	0.211397	0.238592	0.363443	0.274178	0.228854	0.198842	-0.105002	-0.104101	-0.105185	-0.0947596	-0.0917904	-0.0690741	-0.166023	-0.263734	-0.0504266	-0.110787	-0.149812	-0.0612579	-0.186283	-0.306014	-0.257133	-0.1344	-0.257825	-0.209071	-0.133543		0.198995	0.296535	0.131224	0.351456	0.229626	0.201449	0.280228	0.170724	0.260123	0.311342	0.184229
0.298487	0.179858	0.246342	0.302979	0.253735	0.374033	0.177802	0.308365	0.38777	0.354864	0.201873	0.264063	0.171012	0.187684	0.22011	0.348718	0.257615	0.204612	0.172879	-0.10585	-0.108601	-0.108057	-0.0973203	-0.0957386	-0.0738945	-0.172501	-0.26531	-0.0526401	-0.116693	-0.152742	-0.062127	-0.192194	-0.313043	-0.262499	-0.138878	-0.259923	-0.213227	-0.137739		0.193569	0.287804	0.125566	0.344197	0.222175	0.194858	0.276171	0.163035	0.253568	0.30451	0.17733
0.28808	0.157643	0.236412	0.284759	0.244493	0.35237	0.146813	0.284381	0.375898	0.336335	0.187773	0.253265	0.15422	0.16262	0.200496	0.333182	0.239758	0.17943	0.14563	-0.106805	-0.113497	-0.111171	-0.099917	-0.0997885	-0.0788622	-0.179072	-0.267177	-0.0550192	-0.122674	-0.155663	-0.0630145	-0.198224	-0.320219	-0.268177	-0.143534	-0.262046	-0.217304	-0.14199		0.188142	0.278992	0.119909	0.336724	0.214723	0.188266	0.272019	0.155346	0.247014	0.297531	0.170331
0.276993	0.13429	0.2258	0.265465	0.234602	0.329617	0.114486	0.259002	0.363106	0.316953	0.172927	0.241665	0.136678	0.13601	0.179724	0.316712	0.22066	0.153318	0.117159	-0.107903	-0.1186	-0.114473	-0.102582	-0.104129	-0.0840538	-0.18565	-0.269284	-0.0576912	-0.128799	-0.158634	-0.0639621	-0.204389	-0.327539	-0.273943	-0.148227	-0.264248	-0.221131	-0.146339		0.182716	0.270135	0.114296	0.32913	0.20724	0.181595	0.267816	0.147644	0.240429	0.290552	0.163275
0.26524	0.109954	0.214518	0.245063	0.224141	0.305737	0.0810562	0.232282	0.349419	0.296721	0.157458	0.229317	0.118424	0.108065	0.158094	0.2995	0.200274	0.12622	0.0875412	-0.109121	-0.124088	-0.118009	-0.10535	-0.108642	-0.0893427	-0.192306	-0.271674	-0.0603836	-0.135032	-0.161569	-0.0649932	-0.210546	-0.334979	-0.279892	-0.15306	-0.26647	-0.224859	-0.150731		0.177293	0.261282	0.108779	0.321524	0.199691	0.174924	0.263607	0.139914	0.233781	0.283492	0.156216
0.252871	0.0846578	0.202595	0.223565	0.213142	0.280919	0.0465423	0.204298	0.335083	0.275737	0.141223	0.216153	0.0995133	0.0789178	0.135534	0.281561	0.178668	0.0983541	0.0568291	-0.110526	-0.129802	-0.121767	-0.108206	-0.113335	-0.0948266	-0.198931	-0.274327	-0.0634456	-0.14134	-0.164538	-0.0660739	-0.21689	-0.34255	-0.286006	-0.157937	-0.268808	-0.228315	-0.155214		0.17187	0.25248	0.103262	0.313769	0.192142	0.168254	0.259336	0.132184	0.227133	0.276414	0.14911
0.239867	0.0585097	0.190051	0.201085	0.201532	0.255142	0.0110061	0.17515	0.319901	0.253989	0.124363	0.202247	0.0800006	0.0486408	0.111997	0.262826	0.155892	0.0697427	0.0251354	-0.112116	-0.135848	-0.125757	-0.111224	-0.11831	-0.100382	-0.205569	-0.277263	-0.0666149	-0.147805	-0.167539	-0.0672833	-0.223256	-0.350219	-0.292152	-0.16288	-0.271161	-0.231579	-0.15973		0.166516	0.243678	0.0978862	0.306014	0.184627	0.161584	0.255065	0.124535	0.220512	0.269332	0.142004
0.226249	0.0315655	0.176892	0.177658	0.189317	0.22858	-0.0255584	0.144949	0.303859	0.231512	0.10694	0.187628	0.0598673	0.0172212	0.0876521	0.243329	0.131952	0.0404108	-0.00740259	-0.113834	-0.142132	-0.129997	-0.114361	-0.123353	-0.106101	-0.212171	-0.280453	-0.0699337	-0.15428	-0.17049	-0.0685967	-0.229659	-0.358	-0.298467	-0.167875	-0.273648	-0.234609	-0.164318		0.161203	0.235003	0.0925962	0.298269	0.177134	0.154914	0.250801	0.116935	0.213908	0.262245	0.134939
0.212064	0.00381155	0.163172	0.153285	0.176584	0.201187	-0.0629785	0.113658	0.287237	0.208339	0.0888178	0.17227	0.0391762	-0.0153674	0.0626465	0.2232	0.106951	0.0103622	-0.040679	-0.115804	-0.148689	-0.134508	-0.117702	-0.128778	-0.11189	-0.218689	-0.283965	-0.0736218	-0.160947	-0.173521	-0.0699861	-0.236167	-0.365853	-0.304784	-0.172874	-0.276151	-0.237284	-0.168929		0.15589	0.22645	0.0873062	0.290532	0.16964	0.148332	0.246544	0.109336	0.207304	0.255161	0.127915
0.197302	-0.0246116	0.148821	0.127937	0.163388	0.173112	-0.101157	0.0814161	0.269867	0.184567	0.0702043	0.156247	0.0180258	-0.0489564	0.0369376	0.202452	0.0809161	-0.020212	-0.0745543	-0.117873	-0.155497	-0.139232	-0.121221	-0.134224	-0.11777	-0.225179	-0.287681	-0.0773066	-0.167609	-0.176532	-0.0715519	-0.242655	-0.373794	-0.31112	-0.1779	-0.278784	-0.239811	-0.173578		0.15076	0.217897	0.082323	0.282794	0.162353	0.14175	0.242287	0.102024	0.200871	0.248163	0.12089
0.181975	-0.0536219	0.133943	0.101684	0.149708	0.144424	-0.140002	0.0483772	0.251709	0.160202	0.0510803	0.139543	-0.00365133	-0.0833659	0.0105419	0.180993	0.0539208	-0.0512645	-0.108896	-0.120231	-0.162458	-0.144287	-0.124924	-0.140007	-0.12373	-0.231467	-0.291702	-0.0813771	-0.174396	-0.179545	-0.0731684	-0.249185	-0.381776	-0.317478	-0.182907	-0.281438	-0.241882	-0.178245		0.145645	0.209728	0.0773669	0.275246	0.155085	0.135261	0.238133	0.0947378	0.194453	0.241165	0.114091
0.166168	-0.0830963	0.11853	0.0746585	0.135509	0.115277	-0.179499	0.014645	0.233057	0.135268	0.0314267	0.122208	-0.0257442	-0.118541	-0.0163008	0.158992	0.0260231	-0.0827478	-0.143534	-0.122793	-0.169665	-0.149541	-0.12889	-0.145844	-0.129709	-0.237737	-0.295912	-0.0855692	-0.18121	-0.18262	-0.074988	-0.255727	-0.389811	-0.32374	-0.18789	-0.284199	-0.243812	-0.182901		0.140596	0.201579	0.0724984	0.267708	0.147904	0.128864	0.233984	0.0875595	0.188107	0.234301	0.107305
0.149842	-0.112975	0.102628	0.0468909	0.12089	0.0856681	-0.219497	-0.0197194	0.21378	0.109821	0.0113912	0.104322	-0.0481796	-0.154395	-0.0435383	0.136535	-0.002716	-0.114598	-0.178313	-0.125473	-0.176943	-0.15513	-0.132999	-0.151937	-0.135735	-0.243726	-0.300376	-0.0898615	-0.188068	-0.185631	-0.0769124	-0.262204	-0.39785	-0.329951	-0.19282	-0.28699	-0.245262	-0.187561		0.135787	0.193649	0.0679473	0.260321	0.141041	0.122468	0.229916	0.0807728	0.182024	0.227503	0.100681
0.133015	-0.1432	0.0862294	0.0183834	0.10592	0.0557255	-0.259859	-0.0546015	0.193825	0.0839697	-0.00905924	0.0858666	-0.0710284	-0.190892	-0.0711679	0.113579	-0.0321888	-0.146652	-0.213063	-0.128513	-0.184381	-0.160971	-0.137443	-0.158142	-0.141758	-0.249639	-0.305025	-0.0945158	-0.194972	-0.188708	-0.0789427	-0.268651	-0.405899	-0.336086	-0.197716	-0.289848	-0.24648	-0.192166		0.130977	0.18607	0.0633963	0.253175	0.134178	0.116366	0.225978	0.0739862	0.175941	0.220799	0.0943181
0.115795	-0.173631	0.0693683	-0.0108382	0.0906169	0.0255854	-0.300484	-0.0898254	0.173476	0.0577333	-0.0298585	0.0668683	-0.0941593	-0.22783	-0.0990381	0.090172	-0.0622926	-0.178841	-0.247608	-0.131616	-0.191843	-0.167045	-0.141975	-0.164481	-0.147755	-0.255298	-0.309829	-0.0991638	-0.201863	-0.191784	-0.0811898	-0.275079	-0.413914	-0.341968	-0.202477	-0.292743	-0.247337	-0.196741		0.126364	0.178491	0.0591086	0.246029	0.12762	0.110265	0.22204	0.067556	0.170104	0.214327	0.0879547
0.0981414	-0.204155	0.0520711	-0.0406278	0.0749389	-0.00466461	-0.341295	-0.125274	0.152651	0.0311269	-0.05091	0.0474263	-0.117522	-0.26507	-0.127023	0.0664711	-0.0929119	-0.211088	-0.281773	-0.135034	-0.199343	-0.173487	-0.146895	-0.170983	-0.153736	-0.260747	-0.314831	-0.104081	-0.208777	-0.1948	-0.0834644	-0.281297	-0.421888	-0.347837	-0.207219	-0.295659	-0.247773	-0.20122		0.121935	0.171511	0.0550705	0.239358	0.12135	0.104374	0.218372	0.0614635	0.164502	0.207854	0.0821038
0.0800615	-0.234683	0.0343728	-0.0709083	0.058987	-0.0349356	-0.382135	-0.160847	0.131294	0.00422915	-0.0722314	0.0276	-0.141169	-0.302501	-0.155067	0.0425149	-0.123972	-0.243261	-0.315375	-0.138663	-0.206829	-0.180041	-0.151879	-0.177526	-0.159644	-0.266034	-0.319877	-0.109114	-0.215653	-0.19787	-0.0859866	-0.28748	-0.429798	-0.353301	-0.211757	-0.298606	-0.248031	-0.20561		0.117506	0.164661	0.0510324	0.232791	0.11508	0.0986937	0.214762	0.0553711	0.158899	0.201804	0.076365
0.0616805	-0.265134	0.0163076	-0.101619	0.0428308	-0.0650761	-0.422885	-0.196404	0.109659	-0.022868	-0.0937155	0.00736396	-0.164976	-0.340009	-0.183031	0.0183111	-0.15537	-0.275268	-0.348201	-0.142375	-0.214216	-0.187011	-0.157207	-0.184238	-0.165487	-0.270932	-0.325084	-0.114188	-0.222489	-0.200871	-0.0885565	-0.293517	-0.437589	-0.358665	-0.216237	-0.301534	-0.247693	-0.209864		0.113477	0.158031	0.0474691	0.226418	0.109446	0.0930132	0.211269	0.049999	0.153812	0.195798	0.0708391
0.0429756	-0.295356	-0.00209245	-0.132724	0.0265003	-0.0950058	-0.46346	-0.231769	0.0877121	-0.0501288	-0.115303	-0.0132045	-0.188911	-0.377419	-0.210808	-0.00599689	-0.186965	-0.307025	-0.380065	-0.146491	-0.221539	-0.194034	-0.162624	-0.190946	-0.171275	-0.275776	-0.330281	-0.119512	-0.229297	-0.203854	-0.0912825	-0.29926	-0.445287	-0.363741	-0.220546	-0.304466	-0.247294	-0.213941		0.109541	0.152036	0.0440166	0.220607	0.103962	0.087897	0.208117	0.044795	0.148846	0.190118	0.0659304
0.023934	-0.325229	-0.0208167	-0.164122	0.0100124	-0.124668	-0.503708	-0.266809	0.0654186	-0.0775171	-0.136961	-0.0339898	-0.212986	-0.414587	-0.238349	-0.0303396	-0.218616	-0.338406	-0.41076	-0.150633	-0.228648	-0.201445	-0.168279	-0.197765	-0.17691	-0.280091	-0.335541	-0.124826	-0.235951	-0.206843	-0.0941434	-0.304997	-0.452798	-0.368449	-0.224669	-0.307351	-0.246247	-0.21785		0.105669	0.146041	0.0406388	0.214795	0.098581	0.0827808	0.204966	0.0397061	0.143963	0.184732	0.0610217
0.00469106	-0.354698	-0.03983	-0.195678	-0.00656695	-0.153828	-0.543417	-0.30139	0.0429774	-0.10496	-0.158596	-0.0549807	-0.23711	-0.451392	-0.265512	-0.0546698	-0.250206	-0.369207	-0.440137	-0.155048	-0.235603	-0.208921	-0.174061	-0.204578	-0.182531	-0.284372	-0.340772	-0.13026	-0.242577	-0.209682	-0.0970426	-0.310272	-0.46016	-0.373088	-0.228731	-0.310191	-0.245114	-0.221464		0.102325	0.14076	0.0378778	0.209625	0.0940579	0.0780227	0.202214	0.0355668	0.139775	0.179458	0.0568269
-0.0147535	-0.383685	-0.0590683	-0.227318	-0.0231707	-0.182383	-0.582567	-0.335409	0.0203874	-0.132395	-0.180177	-0.0761421	-0.261265	-0.487726	-0.292062	-0.0788318	-0.281623	-0.399447	-0.468051	-0.159649	-0.24229	-0.216646	-0.179964	-0.211412	-0.187948	-0.288152	-0.345958	-0.135761	-0.248981	-0.212509	-0.100148	-0.31538	-0.467313	-0.377025	-0.232415	-0.312969	-0.243483	-0.224892		0.0989818	0.135797	0.0351168	0.204739	0.0895349	0.0736228	0.199639	0.0314276	0.135587	0.174855	0.0529494
-0.0344164	-0.412113	-0.0784923	-0.258959	-0.0397641	-0.210354	-0.621091	-0.368778	-0.00232719	-0.159786	-0.201573	-0.0973628	-0.285403	-0.523475	-0.318071	-0.102788	-0.312691	-0.429056	-0.494378	-0.164285	-0.248672	-0.224488	-0.185999	-0.218237	-0.193342	-0.291782	-0.351083	-0.141262	-0.255286	-0.215277	-0.103253	-0.320356	-0.474215	-0.380949	-0.236089	-0.315633	-0.241629	-0.227874		0.0959169	0.130982	0.0326739	0.199995	0.0854642	0.069223	0.197157	0.0277927	0.131767	0.170251	0.0492256
-0.0541743	-0.439691	-0.0980908	-0.29047	-0.0562982	-0.237685	-0.658841	-0.401225	-0.0250504	-0.187079	-0.222771	-0.118607	-0.309488	-0.558288	-0.343491	-0.126503	-0.343224	-0.457888	-0.519001	-0.169269	-0.254809	-0.232423	-0.192068	-0.225023	-0.198597	-0.295074	-0.35611	-0.146846	-0.261382	-0.21783	-0.106503	-0.324645	-0.480935	-0.38426	-0.239382	-0.318239	-0.239489	-0.230677		0.0932609	0.127177	0.0306976	0.196217	0.082057	0.0657071	0.195301	0.0248974	0.128489	0.166373	0.0465464
-0.0740175	-0.466458	-0.117826	-0.321736	-0.0726783	-0.263937	-0.695431	-0.432577	-0.0477702	-0.21418	-0.243765	-0.139806	-0.333515	-0.592179	-0.367952	-0.149787	-0.373141	-0.485596	-0.541822	-0.174255	-0.260438	-0.240485	-0.19822	-0.231761	-0.203777	-0.298044	-0.360995	-0.152419	-0.267239	-0.22038	-0.109793	-0.328931	-0.487261	-0.38732	-0.242542	-0.320647	-0.237	-0.232852		0.0906049	0.123373	0.0287214	0.192438	0.0786498	0.0621913	0.193446	0.0220022	0.125211	0.16272	0.0438672
-0.0939203	-0.492395	-0.137623	-0.352678	-0.0888838	-0.289245	-0.731045	-0.462878	-0.0703666	-0.241084	-0.264276	-0.160875	-0.357357	-0.625096	-0.391461	-0.172545	-0.402335	-0.512372	-0.562765	-0.179405	-0.265914	-0.248549	-0.204362	-0.238447	-0.208905	-0.300848	-0.365802	-0.157985	-0.27296	-0.222695	-0.113127	-0.332641	-0.493471	-0.390056	-0.245484	-0.323017	-0.234395	-0.234877		0.0885335	0.120293	0.0273552	0.189352	0.0761183	0.0592002	0.192058	0.0200745	0.122661	0.15949	0.0419427
-0.113807	-0.517444	-0.157451	-0.383212	-0.104879	-0.313645	-0.765634	-0.492066	-0.0928328	-0.267762	-0.284436	-0.181791	-0.381054	-0.656954	-0.414114	-0.194831	-0.430697	-0.538157	-0.581777	-0.184686	-0.270642	-0.256664	-0.21048	-0.244998	-0.21394	-0.303169	-0.370344	-0.163539	-0.278248	-0.22484	-0.116529	-0.33593	-0.499107	-0.392206	-0.248071	-0.325098	-0.231383	-0.236067		0.0867094	0.117774	0.0262472	0.1868	0.0739573	0.0567339	0.191032	0.0185561	0.12042	0.156944	0.0406013
-0.133673	-0.541552	-0.177279	-0.413255	-0.120627	-0.337093	-0.799137	-0.520064	-0.115164	-0.294185	-0.304263	-0.202528	-0.404611	-0.687675	-0.435872	-0.21661	-0.458121	-0.562894	-0.598828	-0.189962	-0.275363	-0.264769	-0.216594	-0.251533	-0.21897	-0.305489	-0.374879	-0.16908	-0.283528	-0.226984	-0.119929	-0.339217	-0.504732	-0.394353	-0.250653	-0.327176	-0.228367	-0.237162		0.0848853	0.115255	0.0251392	0.184248	0.0717963	0.0542676	0.190006	0.0170378	0.118179	0.154398	0.03926
[truncated: 248 more columns]
